# Supplementary material
Source: Research Square preprint supplement (doi:10.21203/rs.3.rs-9214080/v1)
Supplement: Supplementary file 1 [file 59099403eda40d92a02deb21.pdf]

**GO:Cell population proliferation**

| User ID | Gene Name                                                    | Species      |
|---------|--------------------------------------------------------------|--------------|
| 9093    | DnaJ heat shock protein family (Hsp40) member A3(DNAJA3)     | Homo sapiens |
| 2737    | GLI family zinc finger 3(GLI3)                               | Homo sapiens |
| 3727    | JunD proto-oncogene, AP-1 transcription factor subunit(JUND) | Homo sapiens |
| 9314    | KLF transcription factor 4(KLF4)                             | Homo sapiens |
| 9891    | NUAK family kinase 1(NUAK1)                                  | Homo sapiens |
| 6926    | T-box transcription factor 3(TBX3)                           | Homo sapiens |
| 7128    | TNF alpha induced protein 3(TNFAIP3)                         | Homo sapiens |
| 9289    | adhesion G protein-coupled receptor G1(ADGRG1)               | Homo sapiens |
| 654     | bone morphogenetic protein 6(BMP6)                           | Homo sapiens |
| 199731  | cell adhesion molecule 4(CADM4)                              | Homo sapiens |
| 54964   | chromosome 1 open reading frame 56(C1orf56)                  | Homo sapiens |
| 1191    | clusterin(CLU)                                               | Homo sapiens |
| 896     | cyclin D3(CCND3)                                             | Homo sapiens |
| 1956    | epidermal growth factor receptor(EGFR)                       | Homo sapiens |
| 56287   | gastrokine 1(GKN1)                                           | Homo sapiens |
| 3623    | inhibin subunit alpha(INHA)                                  | Homo sapiens |
| 3728    | junction plakoglobin(JUP)                                    | Homo sapiens |
| 4286    | melanocyte inducing transcription factor(MITF)               | Homo sapiens |
| 4869    | nucleophosmin 1(NPM1)                                        | Homo sapiens |
| 6446    | serum/glucocorticoid regulated kinase 1(SGK1)                | Homo sapiens |
| 23411   | sirtuin 1(SIRT1)                                             | Homo sapiens |
| 7020    | transcription factor AP-2 alpha(TFAP2A)                      | Homo sapiens |
| 7157    | tumor protein p53(TP53)                                      | Homo sapiens |

**GO:Positive regulation of cell migration**

| User ID   | Gene Name                                                                      | Species      |
|-----------|--------------------------------------------------------------------------------|--------------|
| 1601      | DAB adaptor protein 2(DAB2)                                                    | Homo sapiens |
| 55795     | PCI domain containing 2(PCID2)                                                 | Homo sapiens |
| 65018     | PTEN induced kinase 1(PINK1)                                                   | Homo sapiens |
| 9475      | Rho associated coiled-coil containing protein kinase 2(ROCK2)                  | Homo sapiens |
| 4087      | SMAD family member 2(SMAD2)                                                    | Homo sapiens |
| 100129518 | SOD2 overlapping transcript 1(SOD2-OT1)                                        | Homo sapiens |
| 8717      | TNFRSF1A associated via death domain(TRADD)                                    | Homo sapiens |
| 650       | bone morphogenetic protein 2(BMP2)                                             | Homo sapiens |
| 1003      | cadherin 5(CDH5)                                                               | Homo sapiens |
| 857       | caveolin 1(CAV1)                                                               | Homo sapiens |
| 3491      | cellular communication network factor 1(CCN1)                                  | Homo sapiens |
| 2159      | coagulation factor X(F10)                                                      | Homo sapiens |
| 1277      | collagen type I alpha 1 chain(COL1A1)                                          | Homo sapiens |
| 1956      | epidermal growth factor receptor(EGFR)                                         | Homo sapiens |
| 642273    | family with sequence similarity 110 member C(FAM110C)                          | Homo sapiens |
| 286077    | family with sequence similarity 83 member H(FAM83H)                            | Homo sapiens |
| 1081      | glycoprotein hormones, alpha polypeptide(CGA)                                  | Homo sapiens |
| 4162      | melanoma cell adhesion molecule(MCAM)                                          | Homo sapiens |
| 4739      | neural precursor cell expressed, developmentally down-regulated 9(NEDD9)       | Homo sapiens |
| 5293      | phosphatidylinositol-4,5-bisphosphate 3-kinase catalytic subunit delta(PIK3CD) | Homo sapiens |
| 7803      | protein tyrosine phosphatase 4A1(PTP4A1)                                       | Homo sapiens |
| 5025      | purinergic receptor P2X 4(P2RX4)                                               | Homo sapiens |
| 388       | ras homolog family member B(RHOB)                                              | Homo sapiens |
| 29984     | ras homolog family member D(RHOD)                                              | Homo sapiens |
| 6591      | snail family transcriptional repressor 2(SNAI2)                                | Homo sapiens |
| 7057      | thrombospondin 1(THBS1)                                                        | Homo sapiens |
| 7422      | vascular endothelial growth factor A(VEGFA)                                    | Homo sapiens |
