# Supplementary material
Source: Research Square preprint supplement (doi:10.21203/rs.3.rs-9214080/v1)
Supplement: Supplementary file 2 [file 9fd72fa7cf07034701b79f81.pdf]

| Category     | Term                                                     | Count | List Total | Pop Hits | Pop Total | P-Value  | Benjamini | Fold Enrichment | Bonferroni | FDR      | Fisher Exact |
|--------------|----------------------------------------------------------|-------|------------|----------|-----------|----------|-----------|-----------------|------------|----------|--------------|
| KEGG_PATHWAY | Metabolic pathways                                       | 112   | 444        | 1583     | 9496      | 2.65E-06 | 0.000881  | 1.51            | 0.000881   | 0.000865 | 0.0000017    |
| KEGG_PATHWAY | Hippo signaling pathway                                  | 22    | 444        | 157      | 9496      | 0.000012 | 0.002     | 3.00            | 0.00398    | 0.00196  | 0.00000358   |
| KEGG_PATHWAY | Parathyroid hormone synthesis, secretion and action      | 15    | 444        | 115      | 9496      | 0.000892 | 0.0987    | 2.79            | 0.256      | 0.097    | 0.000286     |
| KEGG_PATHWAY | Biosynthesis of cofactors                                | 17    | 444        | 154      | 9496      | 0.00218  | 0.123     | 2.36            | 0.516      | 0.121    | 0.00084      |
| KEGG_PATHWAY | p53 signaling pathway                                    | 11    | 444        | 75       | 9496      | 0.0024   | 0.123     | 3.14            | 0.55       | 0.121    | 0.000673     |
| KEGG_PATHWAY | Biosynthesis of amino acids                              | 11    | 444        | 75       | 9496      | 0.0024   | 0.123     | 3.14            | 0.55       | 0.121    | 0.000673     |
| KEGG_PATHWAY | Cysteine and methionine metabolism                       | 9     | 444        | 52       | 9496      | 0.0026   | 0.123     | 3.70            | 0.578      | 0.121    | 0.000603     |
| KEGG_PATHWAY | Peroxisome                                               | 11    | 444        | 83       | 9496      | 0.00507  | 0.21      | 2.83            | 0.815      | 0.207    | 0.00159      |
| KEGG_PATHWAY | Proteoglycans in cancer                                  | 19    | 444        | 204      | 9496      | 0.00695  | 0.256     | 1.99            | 0.901      | 0.252    | 0.00321      |
| KEGG_PATHWAY | Alcoholism                                               | 18    | 444        | 191      | 9496      | 0.00789  | 0.262     | 2.02            | 0.928      | 0.257    | 0.00359      |
| KEGG_PATHWAY | Folate biosynthesis                                      | 6     | 444        | 28       | 9496      | 0.00872  | 0.263     | 4.58            | 0.945      | 0.258    | 0.00158      |
| KEGG_PATHWAY | Viral carcinogenesis                                     | 18    | 444        | 205      | 9496      | 0.0153   | 0.397     | 1.88            | 0.994      | 0.39     | 0.00747      |
| KEGG_PATHWAY | Carbon metabolism                                        | 12    | 444        | 117      | 9496      | 0.0205   | 0.397     | 2.19            | 0.999      | 0.39     | 0.00842      |
| KEGG_PATHWAY | Thyroid hormone synthesis                                | 9     | 444        | 75       | 9496      | 0.0231   | 0.397     | 2.57            | 1.00e+0    | 0.39     | 0.00799      |
| KEGG_PATHWAY | Mitophagy - animal                                       | 11    | 444        | 105      | 9496      | 0.0244   | 0.397     | 2.24            | 1.00e+0    | 0.39     | 0.00979      |
| KEGG_PATHWAY | Apoptosis                                                | 13    | 444        | 137      | 9496      | 0.0262   | 0.397     | 2.03            | 1.00e+0    | 0.39     | 0.0117       |
| KEGG_PATHWAY | Basal cell carcinoma                                     | 8     | 444        | 63       | 9496      | 0.0267   | 0.397     | 2.72            | 1.00e+0    | 0.39     | 0.00868      |
| KEGG_PATHWAY | Endocytosis                                              | 20    | 444        | 252      | 9496      | 0.027    | 0.397     | 1.70            | 1.00e+0    | 0.39     | 0.0144       |
| KEGG_PATHWAY | Alanine, aspartate and glutamate metabolism              | 6     | 444        | 37       | 9496      | 0.0275   | 0.397     | 3.47            | 1.00e+0    | 0.39     | 0.00684      |
| KEGG_PATHWAY | Focal adhesion                                           | 17    | 444        | 203      | 9496      | 0.0279   | 0.397     | 1.79            | 1.00e+0    | 0.39     | 0.0143       |
| KEGG_PATHWAY | Inositol phosphate metabolism                            | 9     | 444        | 78       | 9496      | 0.0284   | 0.397     | 2.47            | 1.00e+0    | 0.39     | 0.0103       |
| KEGG_PATHWAY | Estrogen signaling pathway                               | 13    | 444        | 139      | 9496      | 0.0289   | 0.397     | 2.00            | 1.00e+0    | 0.39     | 0.0131       |
| KEGG_PATHWAY | Thiamine metabolism                                      | 4     | 444        | 15       | 9496      | 0.0302   | 0.397     | 5.70            | 1.00e+0    | 0.39     | 0.00426      |
| KEGG_PATHWAY | Cellular senescence                                      | 14    | 444        | 157      | 9496      | 0.0318   | 0.397     | 1.91            | 1.00e+0    | 0.39     | 0.0152       |
| KEGG_PATHWAY | PI3K-Akt signaling pathway                               | 26    | 444        | 362      | 9496      | 0.0325   | 0.397     | 1.54            | 1.00e+0    | 0.39     | 0.0191       |
| KEGG_PATHWAY | Wnt signaling pathway                                    | 15    | 444        | 174      | 9496      | 0.0328   | 0.397     | 1.84            | 1.00e+0    | 0.39     | 0.0162       |
| KEGG_PATHWAY | Aminoacyl-tRNA biosynthesis                              | 8     | 444        | 66       | 9496      | 0.0334   | 0.397     | 2.59            | 1.00e+0    | 0.39     | 0.0114       |
| KEGG_PATHWAY | Signaling pathways regulating pluripotency of stem cells | 13    | 444        | 144      | 9496      | 0.0366   | 0.397     | 1.93            | 1.00e+0    | 0.39     | 0.0172       |
| KEGG_PATHWAY | Systemic lupus erythematosus                             | 13    | 444        | 144      | 9496      | 0.0366   | 0.397     | 1.93            | 1.00e+0    | 0.39     | 0.0172       |
| KEGG_PATHWAY | Pathways in cancer                                       | 35    | 444        | 533      | 9496      | 0.0377   | 0.397     | 1.40            | 1.00e+0    | 0.39     | 0.0251       |
| KEGG_PATHWAY | Human papillomavirus infection                           | 24    | 444        | 333      | 9496      | 0.0395   | 0.397     | 1.54            | 1.00e+0    | 0.39     | 0.0229       |
| KEGG_PATHWAY | Relaxin signaling pathway                                | 12    | 444        | 130      | 9496      | 0.0402   | 0.397     | 1.97            | 1.00e+0    | 0.39     | 0.0184       |
| KEGG_PATHWAY | Neutrophil extracellular trap formation                  | 16    | 444        | 196      | 9496      | 0.0406   | 0.397     | 1.75            | 1.00e+0    | 0.39     | 0.0213       |
| KEGG_PATHWAY | Glycine, serine and threonine metabolism                 | 6     | 444        | 41       | 9496      | 0.0407   | 0.397     | 3.13            | 1.00e+0    | 0.39     | 0.0113       |
| KEGG_PATHWAY | Selenocompound metabolism                                | 4     | 444        | 17       | 9496      | 0.0421   | 0.4       | 5.03            | 1.00e+0    | 0.392    | 0.0069       |
| KEGG_PATHWAY | Cytoskeleton in muscle cells                             | 18    | 444        | 233      | 9496      | 0.0458   | 0.41      | 1.65            | 1.00e+0    | 0.403    | 0.0249       |
| KEGG_PATHWAY | Lysosome                                                 | 12    | 444        | 133      | 9496      | 0.0462   | 0.41      | 1.93            | 1.00e+0    | 0.403    | 0.0217       |
| KEGG_PATHWAY | Chemical carcinogenesis - receptor activation            | 17    | 444        | 217      | 9496      | 0.0469   | 0.41      | 1.68            | 1.00e+0    | 0.403    | 0.0256       |
| KEGG_PATHWAY | Protein digestion and absorption                         | 10    | 444        | 105      | 9496      | 0.0561   | 0.478     | 2.04            | 1.00e+0    | 0.469    | 0.0247       |
| KEGG_PATHWAY | Gastric acid secretion                                   | 8     | 444        | 76       | 9496      | 0.0634   | 0.492     | 2.25            | 1.00e+0    | 0.483    | 0.025        |
| KEGG_PATHWAY | PPAR signaling pathway                                   | 8     | 444        | 76       | 9496      | 0.0634   | 0.492     | 2.25            | 1.00e+0    | 0.483    | 0.025        |
| KEGG_PATHWAY | 2-Oxocarboxylic acid metabolism                          | 5     | 444        | 33       | 9496      | 0.0658   | 0.492     | 3.24            | 1.00e+0    | 0.483    | 0.0176       |
| KEGG_PATHWAY | Human cytomegalovirus infection                          | 17    | 444        | 227      | 9496      | 0.0665   | 0.492     | 1.60            | 1.00e+0    | 0.483    | 0.037        |
| KEGG_PATHWAY | Pancreatic cancer                                        | 8     | 444        | 77       | 9496      | 0.0671   | 0.492     | 2.22            | 1.00e+0    | 0.483    | 0.0269       |
| KEGG_PATHWAY | Fluid shear stress and atherosclerosis                   | 12    | 444        | 142      | 9496      | 0.0677   | 0.492     | 1.81            | 1.00e+0    | 0.483    | 0.0339       |
| KEGG_PATHWAY | Adherens junction                                        | 9     | 444        | 93       | 9496      | 0.0682   | 0.492     | 2.07            | 1.00e+0    | 0.483    | 0.0294       |
| KEGG_PATHWAY | Platelet activation                                      | 11    | 444        | 126      | 9496      | 0.0696   | 0.492     | 1.87            | 1.00e+0    | 0.483    | 0.0336       |
| KEGG_PATHWAY | Valine, leucine and isoleucine degradation               | 6     | 444        | 48       | 9496      | 0.0716   | 0.495     | 2.67            | 1.00e+0    | 0.486    | 0.0235       |
| KEGG_PATHWAY | Purine metabolism                                        | 11    | 444        | 128      | 9496      | 0.0757   | 0.513     | 1.84            | 1.00e+0    | 0.504    | 0.0371       |

|              |                                                           |    |     |     |      |        |       |      |         |       |        |
|--------------|-----------------------------------------------------------|----|-----|-----|------|--------|-------|------|---------|-------|--------|
| KEGG_PATHWAY | EGFR tyrosine kinase inhibitor resistance                 | 8  | 444 | 80  | 9496 | 0.0789 | 0.524 | 2.14 | 1.00e+0 | 0.515 | 0.0328 |
| KEGG_PATHWAY | Phosphatidylinositol signaling system                     | 9  | 444 | 98  | 9496 | 0.0866 | 0.533 | 1.96 | 1.00e+0 | 0.524 | 0.0394 |
| KEGG_PATHWAY | cGMP-PKG signaling pathway                                | 13 | 444 | 166 | 9496 | 0.0874 | 0.533 | 1.67 | 1.00e+0 | 0.524 | 0.0472 |
| KEGG_PATHWAY | Terpenoid backbone biosynthesis                           | 4  | 444 | 23  | 9496 | 0.0895 | 0.533 | 3.72 | 1.00e+0 | 0.524 | 0.0206 |
| KEGG_PATHWAY | Cholinergic synapse                                       | 10 | 444 | 116 | 9496 | 0.0919 | 0.533 | 1.84 | 1.00e+0 | 0.524 | 0.0447 |
| KEGG_PATHWAY | Nicotinate and nicotinamide metabolism                    | 5  | 444 | 38  | 9496 | 0.0993 | 0.533 | 2.81 | 1.00e+0 | 0.524 | 0.0307 |
| KEGG_PATHWAY | Aldosterone-regulated sodium reabsorption                 | 5  | 444 | 38  | 9496 | 0.0993 | 0.533 | 2.81 | 1.00e+0 | 0.524 | 0.0307 |
| KEGG_PATHWAY | Endocrine and other factor-regulated calcium reabsorption | 6  | 444 | 53  | 9496 | 0.0998 | 0.533 | 2.42 | 1.00e+0 | 0.524 | 0.0362 |
| KEGG_PATHWAY | Hepatocellular carcinoma                                  | 13 | 444 | 170 | 9496 | 0.0999 | 0.533 | 1.64 | 1.00e+0 | 0.524 | 0.0552 |
