# Supplementary material
Source: Research Square preprint supplement (doi:10.21203/rs.3.rs-9214080/v1)
Supplement: Supplementary file 3 [file aa0082943cd09e8ebe158a6d.pdf]

# Supplementary Figure 1

A

Control cell

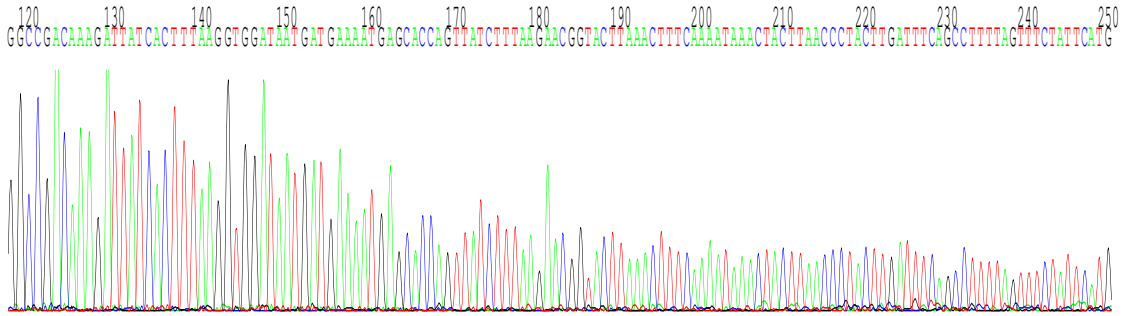

NPM1 KD cell

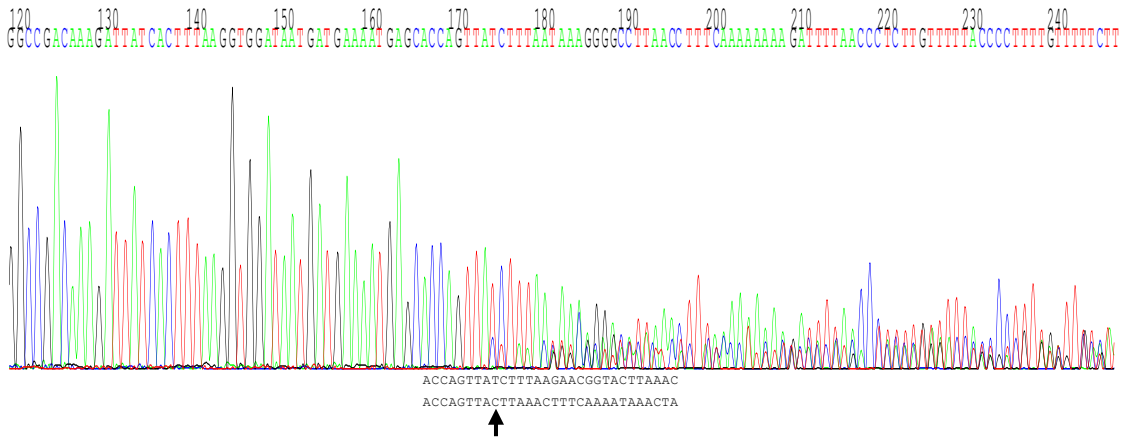

B

Exon 2

KD allele-1 AATGAGCACCAGTTATCTTTAAGAACGGTACTTAACTTTCAAATAAACTA  
KD allele-2 AATGAGCACCAGTTAT CTTAACTTTCAAATAAACTA

## Sequences of the NPM1 gene surrounding the Exon 2/Intron 2 junction.

PCR-amplified genomic DNA from control and NPM1-KD cells was subjected to sequencing. The resulting sequences for both cell types are shown in A, with the sequences identified during the reaction indicated at the top of each sequence data. For NPM1-KD cells, two predicted allelic sequences derived from the sequencing data are shown below the sequence data. The arrow indicates the predicted site of genome editing. In B, the sequences of the two alleles in NPM1-KD cells, as inferred from the results in A, are shown. The guide RNA sequence used are underlined. The last part of the Exon 2 are shown with grey background. A precise method for sequencing reaction was described in Supplemental materials and methods.
