# Supplementary material
Source: Research Square preprint supplement (doi:10.21203/rs.3.rs-9214080/v1)
Supplement: Supplementary file 4 [file aad7a469017eeec51c132d47.pdf]

| Gene Name    | Forward and Reverse primer sequences                      |
|--------------|-----------------------------------------------------------|
| <i>GAPDH</i> | 5'-CCACATCGCTCAGACACCAT-3' and 5'-GCGCCCAATACGACCAAA-3'   |
| <i>EGFR</i>  | 5'-CCAGTGTGCCCACTACATTG-3' and 5'-CTTCCAGACCAGGGTGTGT-3'  |
| <i>CCN1</i>  | 5'-GGAAGCCTTGCTCATTCTTG-3' and 5'-TGGCTGCATTAGTGTCCATC-3' |
| <i>CCN2</i>  | 5'-GGAAAAGATTCCCACCCAAT-3' and 5'-AAACCAGTGTTGGGGTTGA-3'  |
