# Supplementary material
Source: Research Square preprint supplement (doi:10.21203/rs.3.rs-9214080/v1)
Supplement: Supplementary file 5 [file c60190d68dd9988311f1dd85.pdf]

| GO with down regulated genes |                                                                                       |       |       |            |          |           |          |           |                 |            |        |              |
|------------------------------|---------------------------------------------------------------------------------------|-------|-------|------------|----------|-----------|----------|-----------|-----------------|------------|--------|--------------|
| Category                     | Term                                                                                  | Genes | Count | List Total | Pop Hits | Pop Total | P-Value  | Benjamini | Fold Enrichment | Bonferroni | FDR    | Fisher Exact |
| GOTERM_BP_DIRECT             | negative regulation of apoptotic process                                              | 4%    | 47    | 870        | 543      | 19512     | 2.41E-05 | 0.0532    | 1.94            | 0.0897     | 0.0531 | 0.0000115    |
| GOTERM_BP_DIRECT             | negative regulation of cell population proliferation                                  | 4%    | 41    | 870        | 450      | 19512     | 2.72E-05 | 0.0532    | 2.04            | 0.101      | 0.0531 | 0.0000125    |
| GOTERM_BP_DIRECT             | endochondral ossification                                                             | 1%    | 9     | 870        | 32       | 19512     | 6.07E-05 | 0.079     | 6.31            | 0.211      | 0.0789 | 0.0000742    |
| GOTERM_BP_DIRECT             | kidney development                                                                    | 2%    | 19    | 870        | 149      | 19512     | 0.000115 | 0.0906    | 2.86            | 0.363      | 0.0904 | 0.0000363    |
| GOTERM_BP_DIRECT             | regulation of cell population proliferation                                           | 2%    | 23    | 870        | 204      | 19512     | 0.000118 | 0.0906    | 2.53            | 0.37       | 0.0904 | 0.0000426    |
| GOTERM_BP_DIRECT             | osteoblast differentiation                                                            | 2%    | 18    | 870        | 138      | 19512     | 0.000139 | 0.0906    | 2.93            | 0.419      | 0.0904 | 0.0000426    |
| GOTERM_BP_DIRECT             | negative regulation of cell cycle                                                     | 1%    | 11    | 870        | 59       | 19512     | 0.000252 | 0.126     | 4.18            | 0.626      | 0.126  | 0.0000511    |
| GOTERM_BP_DIRECT             | developmental growth                                                                  | 1%    | 8     | 870        | 30       | 19512     | 0.000281 | 0.126     | 5.98            | 0.666      | 0.126  | 0.0000369    |
| GOTERM_BP_DIRECT             | negative regulation of fat cell differentiation                                       | 1%    | 11    | 870        | 60       | 19512     | 0.00029  | 0.126     | 4.11            | 0.678      | 0.126  | 0.0000601    |
| GOTERM_BP_DIRECT             | response to ischemia                                                                  | 1%    | 11    | 870        | 65       | 19512     | 0.000564 | 0.22      | 3.80            | 0.89       | 0.22   | 0.000128     |
| GOTERM_BP_DIRECT             | positive regulation of cell migration                                                 | 2%    | 27    | 870        | 300      | 19512     | 0.000958 | 0.33      | 2.02            | 0.976      | 0.33   | 0.000444     |
| GOTERM_BP_DIRECT             | amino acid biosynthetic process                                                       | 1%    | 7     | 870        | 27       | 19512     | 0.00102  | 0.33      | 5.81            | 0.981      | 0.33   | 0.000139     |
| GOTERM_BP_DIRECT             | response to toxic substance                                                           | 1%    | 12    | 870        | 84       | 19512     | 0.00122  | 0.367     | 3.20            | 0.992      | 0.367  | 0.000336     |
| GOTERM_BP_DIRECT             | positive regulation of miRNA transcription                                            | 1%    | 10    | 870        | 61       | 19512     | 0.00143  | 0.399     | 3.68            | 0.996      | 0.399  | 0.000337     |
| GOTERM_BP_DIRECT             | ossification                                                                          | 1%    | 14    | 870        | 113      | 19512     | 0.00156  | 0.405     | 2.78            | 0.998      | 0.405  | 0.000502     |
| GOTERM_BP_DIRECT             | response to steroid hormone                                                           | 1%    | 7     | 870        | 30       | 19512     | 0.00182  | 0.444     | 5.23            | 0.999      | 0.443  | 0.000283     |
| GOTERM_BP_DIRECT             | cellular response to glucagon stimulus                                                | 0%    | 5     | 870        | 13       | 19512     | 0.00202  | 0.461     | 8.63            | 1.00E+0    | 0.46   | 0.000166     |
| GOTERM_BP_DIRECT             | positive regulation of angiogenesis                                                   | 2%    | 17    | 870        | 160      | 19512     | 0.00213  | 0.461     | 2.38            | 1.00E+0    | 0.46   | 0.000812     |
| GOTERM_BP_DIRECT             | regulation of small GTPase mediated signal transduction                               | 1%    | 14    | 870        | 121      | 19512     | 0.00288  | 0.556     | 2.59            | 1.00E+0    | 0.556  | 0.000999     |
| GOTERM_BP_DIRECT             | positive regulation of gene expression                                                | 3%    | 38    | 870        | 515      | 19512     | 0.00302  | 0.556     | 1.65            | 1.00E+0    | 0.556  | 0.00171      |
| GOTERM_BP_DIRECT             | positive regulation of endothelial cell migration                                     | 1%    | 10    | 870        | 68       | 19512     | 0.00309  | 0.556     | 3.30            | 1.00E+0    | 0.556  | 0.00082      |
| GOTERM_BP_DIRECT             | negative regulation of transcription by RNA polymerase II                             | 6%    | 66    | 870        | 1034     | 19512     | 0.00315  | 0.556     | 1.43            | 1.00E+0    | 0.556  | 0.00216      |
| GOTERM_BP_DIRECT             | phosphatidylinositol phosphate biosynthetic process                                   | 1%    | 8     | 870        | 45       | 19512     | 0.00351  | 0.556     | 3.99            | 1.00E+0    | 0.556  | 0.000751     |
| GOTERM_BP_DIRECT             | bone morphogenesis                                                                    | 1%    | 7     | 870        | 34       | 19512     | 0.00354  | 0.556     | 4.62            | 1.00E+0    | 0.556  | 0.00064      |
| GOTERM_BP_DIRECT             | negative regulation of chondrocyte differentiation                                    | 1%    | 6     | 870        | 24       | 19512     | 0.00363  | 0.556     | 5.61            | 1.00E+0    | 0.556  | 0.000521     |
| GOTERM_BP_DIRECT             | skeletal system development                                                           | 1%    | 16    | 870        | 154      | 19512     | 0.00371  | 0.556     | 2.33            | 1.00E+0    | 0.556  | 0.00145      |
| GOTERM_BP_DIRECT             | gene expression                                                                       | 2%    | 24    | 870        | 282      | 19512     | 0.00402  | 0.559     | 1.91            | 1.00E+0    | 0.558  | 0.00192      |
| GOTERM_BP_DIRECT             | post-embryonic development                                                            | 1%    | 11    | 870        | 84       | 19512     | 0.00408  | 0.559     | 2.94            | 1.00E+0    | 0.558  | 0.00123      |
| GOTERM_BP_DIRECT             | negative regulation of gene expression                                                | 3%    | 28    | 870        | 351      | 19512     | 0.00427  | 0.559     | 1.79            | 1.00E+0    | 0.558  | 0.00223      |
| GOTERM_BP_DIRECT             | endoplasmic reticulum unfolded protein response                                       | 1%    | 9     | 870        | 59       | 19512     | 0.00444  | 0.559     | 3.42            | 1.00E+0    | 0.558  | 0.00113      |
| GOTERM_BP_DIRECT             | negative regulation of protein ubiquitination                                         | 1%    | 9     | 870        | 59       | 19512     | 0.00444  | 0.559     | 3.42            | 1.00E+0    | 0.558  | 0.00113      |
| GOTERM_BP_DIRECT             | tRNA aminoacylation for protein translation                                           | 1%    | 7     | 870        | 36       | 19512     | 0.00476  | 0.58      | 4.36            | 1.00E+0    | 0.579  | 0.000919     |
| GOTERM_BP_DIRECT             | proximal/distal pattern formation                                                     | 1%    | 6     | 870        | 26       | 19512     | 0.00522  | 0.593     | 5.18            | 1.00E+0    | 0.592  | 0.000826     |
| GOTERM_BP_DIRECT             | negative regulation of fibroblast proliferation                                       | 1%    | 7     | 870        | 37       | 19512     | 0.00547  | 0.593     | 4.24            | 1.00E+0    | 0.592  | 0.00109      |
| GOTERM_BP_DIRECT             | positive regulation of intrinsic apoptotic signaling pathway                          | 1%    | 7     | 870        | 37       | 19512     | 0.00547  | 0.593     | 4.24            | 1.00E+0    | 0.592  | 0.00109      |
| GOTERM_BP_DIRECT             | mammary gland development                                                             | 1%    | 7     | 870        | 37       | 19512     | 0.00547  | 0.593     | 4.24            | 1.00E+0    | 0.592  | 0.00109      |
| GOTERM_BP_DIRECT             | cellular response to epidermal growth factor stimulus                                 | 1%    | 8     | 870        | 49       | 19512     | 0.0057   | 0.601     | 3.66            | 1.00E+0    | 0.6    | 0.00134      |
| GOTERM_BP_DIRECT             | response to oxidative stress                                                          | 1%    | 15    | 870        | 148      | 19512     | 0.0064   | 0.657     | 2.27            | 1.00E+0    | 0.656  | 0.00256      |
| GOTERM_BP_DIRECT             | response to hypoxia                                                                   | 2%    | 17    | 870        | 181      | 19512     | 0.0071   | 0.69      | 2.11            | 1.00E+0    | 0.689  | 0.00309      |
| GOTERM_BP_DIRECT             | positive regulation of protein-containing complex assembly                            | 1%    | 8     | 870        | 51       | 19512     | 0.00711  | 0.69      | 3.52            | 1.00E+0    | 0.689  | 0.00175      |
| GOTERM_BP_DIRECT             | phosphate-containing compound metabolic process                                       | 1%    | 6     | 870        | 28       | 19512     | 0.00725  | 0.69      | 4.81            | 1.00E+0    | 0.689  | 0.00125      |
| GOTERM_BP_DIRECT             | canonical Wnt signaling pathway                                                       | 1%    | 12    | 870        | 106      | 19512     | 0.00759  | 0.705     | 2.54            | 1.00E+0    | 0.704  | 0.00269      |
| GOTERM_BP_DIRECT             | cellular response to glucose starvation                                               | 1%    | 8     | 870        | 52       | 19512     | 0.00791  | 0.711     | 3.45            | 1.00E+0    | 0.71   | 0.00199      |
| GOTERM_BP_DIRECT             | chondrocyte differentiation                                                           | 1%    | 9     | 870        | 65       | 19512     | 0.00801  | 0.711     | 3.11            | 1.00E+0    | 0.71   | 0.00227      |
| GOTERM_BP_DIRECT             | L-serine metabolic process                                                            | 0%    | 4     | 870        | 10       | 19512     | 0.00835  | 0.724     | 8.97            | 1.00E+0    | 0.723  | 0.000664     |
| GOTERM_BP_DIRECT             | negative regulation of oxidative stress-induced intrinsic apoptotic signaling pathway | 0%    | 5     | 870        | 19       | 19512     | 0.00887  | 0.737     | 5.90            | 1.00E+0    | 0.736  | 0.0012       |
| GOTERM_BP_DIRECT             | phosphatidylinositol 3-kinase/protein kinase B signal transduction                    | 1%    | 11    | 870        | 94       | 19512     | 0.009    | 0.737     | 2.62            | 1.00E+0    | 0.736  | 0.00307      |
| GOTERM_BP_DIRECT             | positive regulation of osteoblast differentiation                                     | 1%    | 10    | 870        | 80       | 19512     | 0.00907  | 0.737     | 2.80            | 1.00E+0    | 0.736  | 0.00288      |
| GOTERM_BP_DIRECT             | homocysteine metabolic process                                                        | 0%    | 4     | 870        | 11       | 19512     | 0.0111   | 0.841     | 8.16            | 1.00E+0    | 0.839  | 0.00101      |
| GOTERM_BP_DIRECT             | response to caloric restriction                                                       | 0%    | 4     | 870        | 11       | 19512     | 0.0111   | 0.841     | 8.16            | 1.00E+0    | 0.839  | 0.00101      |
| GOTERM_BP_DIRECT             | proline transport                                                                     | 0%    | 4     | 870        | 11       | 19512     | 0.0111   | 0.841     | 8.16            | 1.00E+0    | 0.839  | 0.00101      |
| GOTERM_BP_DIRECT             | endothelial cell-cell adhesion                                                        | 0%    | 3     | 870        | 4        | 19512     | 0.0112   | 0.841     | 16.82           | 1.00E+0    | 0.839  | 0.000342     |
| GOTERM_BP_DIRECT             | cellular response to ionizing radiation                                               | 1%    | 7     | 870        | 43       | 19512     | 0.0114   | 0.843     | 3.65            | 1.00E+0    | 0.842  | 0.00271      |
| GOTERM_BP_DIRECT             | positive regulation of nitric oxide biosynthetic process                              | 1%    | 7     | 870        | 44       | 19512     | 0.0128   | 0.923     | 3.57            | 1.00E+0    | 0.922  | 0.0031       |
| GOTERM_BP_DIRECT             | in utero embryonic development                                                        | 2%    | 21    | 870        | 262      | 19512     | 0.0137   | 0.964     | 1.80            | 1.00E+0    | 0.963  | 0.00708      |
| GOTERM_BP_DIRECT             | bone mineralization                                                                   | 1%    | 8     | 870        | 58       | 19512     | 0.0141   | 0.964     | 3.09            | 1.00E+0    | 0.963  | 0.00402      |
| GOTERM_BP_DIRECT             | heart development                                                                     | 2%    | 22    | 870        | 280      | 19512     | 0.0142   | 0.964     | 1.76            | 1.00E+0    | 0.963  | 0.00746      |
| GOTERM_BP_DIRECT             | collagen biosynthetic process                                                         | 0%    | 4     | 870        | 12       | 19512     | 0.0143   | 0.964     | 7.48            | 1.00E+0    | 0.963  | 0.00146      |
| GOTERM_BP_DIRECT             | fibroblast growth factor receptor signaling pathway                                   | 1%    | 8     | 870        | 59       | 19512     | 0.0155   | 0.987     | 3.04            | 1.00E+0    | 0.986  | 0.00447      |
| GOTERM_BP_DIRECT             | cellular senescence                                                                   | 1%    | 8     | 870        | 59       | 19512     | 0.0155   | 0.987     | 3.04            | 1.00E+0    | 0.986  | 0.00447      |
| GOTERM_BP_DIRECT             | reactive oxygen species metabolic process                                             | 1%    | 7     | 870        | 46       | 19512     | 0.0157   | 0.987     | 3.41            | 1.00E+0    | 0.986  | 0.00401      |
| GOTERM_BP_DIRECT             | response to retinoic acid                                                             | 1%    | 7     | 870        | 46       | 19512     | 0.0157   | 0.987     | 3.41            | 1.00E+0    | 0.986  | 0.00401      |
| GOTERM_BP_DIRECT             | protein export from nucleus                                                           | 1%    | 6     | 870        | 34       | 19512     | 0.0165   | 0.987     | 3.96            | 1.00E+0    | 0.986  | 0.00356      |
| GOTERM_BP_DIRECT             | embryonic digit morphogenesis                                                         | 1%    | 8     | 870        | 60       | 19512     | 0.0168   | 0.987     | 2.99            | 1.00E+0    | 0.986  | 0.00496      |
| GOTERM_BP_DIRECT             | endothelial cell migration                                                            | 1%    | 7     | 870        | 47       | 19512     | 0.0174   | 0.987     | 3.34            | 1.00E+0    | 0.986  | 0.00453      |
| GOTERM_BP_DIRECT             | regulation of cell cycle                                                              | 2%    | 21    | 870        | 269      | 19512     | 0.0178   | 0.987     | 1.75            | 1.00E+0    | 0.986  | 0.00943      |
| GOTERM_BP_DIRECT             | tRNA aminoacylation                                                                   | 0%    | 4     | 870        | 13       | 19512     | 0.018    | 0.987     | 6.90            | 1.00E+0    | 0.986  | 0.00203      |
| GOTERM_BP_DIRECT             | cellular response to epinephrine stimulus                                             | 0%    | 4     | 870        | 13       | 19512     | 0.018    | 0.987     | 6.90            | 1.00E+0    | 0.986  | 0.00203      |
| GOTERM_BP_DIRECT             | negative regulation of multicellular organism growth                                  | 0%    | 4     | 870        | 13       | 19512     | 0.018    | 0.987     | 6.90            | 1.00E+0    | 0.986  | 0.00203      |
| GOTERM_BP_DIRECT             | positive regulation of epithelial tube formation                                      | 0%    | 3     | 870        | 5        | 19512     | 0.0181   | 0.987     | 13.46           | 1.00E+0    | 0.986  | 0.000826     |
| GOTERM_BP_DIRECT             | cerebral cortex radial glia-guided migration                                          | 0%    | 3     | 870        | 5        | 19512     | 0.0181   | 0.987     | 13.46           | 1.00E+0    | 0.986  | 0.000826     |
| GOTERM_BP_DIRECT             | regulation of mitotic cell cycle                                                      | 1%    | 9     | 870        | 75       | 19512     | 0.0182   | 0.987     | 2.69            | 1.00E+0    | 0.986  | 0.00602      |
| GOTERM_BP_DIRECT             | placenta development                                                                  | 1%    | 7     | 870        | 48       | 19512     | 0.0191   | 1.00E+0   | 3.27            | 1.00E+0    | 0.999  | 0.0051       |
| GOTERM_BP_DIRECT             | hematopoietic progenitor cell differentiation                                         | 1%    | 9     | 870        | 76       | 19512     | 0.0196   | 1.00E+0   | 2.66            | 1.00E+0    | 0.999  | 0.00656      |
| GOTERM_BP_DIRECT             | Wnt signaling pathway                                                                 | 2%    | 19    | 870        | 237      | 19512     | 0.0196   | 1.00E+0   | 1.80            | 1.00E+0    | 0.999  | 0.0101       |
| GOTERM_BP_DIRECT             | nitric oxide biosynthetic process                                                     | 0%    | 5     | 870        | 24       | 19512     | 0.0204   | 1.00E+0   | 4.67            | 1.00E+0    | 0.999  | 0.00365      |
| GOTERM_BP_DIRECT             | ventricular septum development                                                        | 1%    | 6     | 870        | 36       | 19512     | 0.0208   | 1.00E+0   | 3.74            | 1.00E+0    | 0.999  | 0.00478      |
| GOTERM_BP_DIRECT             | response to testosterone                                                              | 1%    | 6     | 870        | 36       | 19512     | 0.0208   | 1.00E+0   | 3.74            | 1.00E+0    | 0.999  | 0.00478      |
| GOTERM_BP_DIRECT             | cellular response to glucose stimulus                                                 | 1%    | 9     | 870        | 77       | 19512     | 0.021    | 1.00E+0   | 2.62            | 1.00E+0    | 0.999  | 0.00714      |
| GOTERM_BP_DIRECT             | angiogenesis                                                                          | 2%    | 22    | 870        | 292      | 19512     | 0.0215   | 1.00E+0   | 1.69            | 1.00E+0    | 0.999  | 0.0118       |
| GOTERM_BP_DIRECT             | negative regulation of ferroptosis                                                    | 0%    | 4     | 870        | 14       | 19512     | 0.0222   | 1.00E+0   | 6.41            | 1.00E+0    | 0.999  | 0.00274      |
| GOTERM_BP_DIRECT             | locomotor rhythm                                                                      | 0%    | 4     | 870        | 14       | 19512     | 0.0222   | 1.00E+0   | 6.41            | 1.00E+0    | 0.999  | 0.00274      |
| GOTERM_BP_DIRECT             | response to unfolded protein                                                          | 1%    | 9     | 870        | 78       | 19512     | 0.0225   | 1.00E+0   | 2.59            | 1.00E+0    | 0.999  | 0.00777      |
| GOTERM_BP_DIRECT             | positive regulation of MAPK cascade                                                   | 2%    | 18    | 870        | 224      | 19512     | 0.023    | 1.00E+0   | 1.80            | 1.00E+0    | 0.999  | 0.0117       |
| GOTERM_BP_DIRECT             | positive regulation of blood vessel endothelial cell migration                        | 1%    | 7     | 870        | 50       | 19512     | 0.023    | 1.00E+0   | 3.14            | 1.00E+0    | 0.999  | 0.00641      |
| GOTERM_BP_DIRECT             | integrated stress response signaling                                                  | 0%    | 5     | 870        | 25       | 19512     | 0.0234   | 1.00E+0   | 4.49            |            |        |              |

|                  |                                                                                        |    |    |     |      |       |        |         |      |         |       |         |
|------------------|----------------------------------------------------------------------------------------|----|----|-----|------|-------|--------|---------|------|---------|-------|---------|
| GOTERM_BP_DIRECT | hormone metabolic process                                                              | 0% | 5  | 870 | 28   | 19512 | 0.0342 | 1.00e+0 | 4.00 | 1.00e+0 | 0.999 | 0.00728 |
| GOTERM_BP_DIRECT | hippo signaling                                                                        | 0% | 5  | 870 | 28   | 19512 | 0.0342 | 1.00e+0 | 4.00 | 1.00e+0 | 0.999 | 0.00728 |
| GOTERM_BP_DIRECT | intracellular protein localization                                                     | 1% | 16 | 870 | 200  | 19512 | 0.0343 | 1.00e+0 | 1.79 | 1.00e+0 | 0.999 | 0.0175  |
| GOTERM_BP_DIRECT | mitochondrion organization                                                             | 1% | 12 | 870 | 133  | 19512 | 0.0354 | 1.00e+0 | 2.02 | 1.00e+0 | 0.999 | 0.0159  |
| GOTERM_BP_DIRECT | cellular response to iron ion                                                          | 0% | 3  | 870 | 7    | 19512 | 0.0358 | 1.00e+0 | 9.61 | 1.00e+0 | 0.999 | 0.0027  |
| GOTERM_BP_DIRECT | regulation of DNA damage response, signal transduction by p53 class mediator           | 0% | 3  | 870 | 7    | 19512 | 0.0358 | 1.00e+0 | 9.61 | 1.00e+0 | 0.999 | 0.0027  |
| GOTERM_BP_DIRECT | enucleate erythrocyte differentiation                                                  | 0% | 3  | 870 | 7    | 19512 | 0.0358 | 1.00e+0 | 9.61 | 1.00e+0 | 0.999 | 0.0027  |
| GOTERM_BP_DIRECT | muscle tissue development                                                              | 0% | 3  | 870 | 7    | 19512 | 0.0358 | 1.00e+0 | 9.61 | 1.00e+0 | 0.999 | 0.0027  |
| GOTERM_BP_DIRECT | cellular response to transforming growth factor beta stimulus                          | 1% | 8  | 870 | 70   | 19512 | 0.0358 | 1.00e+0 | 2.56 | 1.00e+0 | 0.999 | 0.0124  |
| GOTERM_BP_DIRECT | enzyme-linked receptor protein signaling pathway                                       | 0% | 4  | 870 | 17   | 19512 | 0.0375 | 1.00e+0 | 5.28 | 1.00e+0 | 0.999 | 0.00587 |
| GOTERM_BP_DIRECT | rhythmic process                                                                       | 1% | 13 | 870 | 151  | 19512 | 0.0376 | 1.00e+0 | 1.93 | 1.00e+0 | 0.999 | 0.0177  |
| GOTERM_BP_DIRECT | response to hydrogen peroxide                                                          | 1% | 6  | 870 | 42   | 19512 | 0.0378 | 1.00e+0 | 3.20 | 1.00e+0 | 0.999 | 0.0103  |
| GOTERM_BP_DIRECT | regulation of developmental process                                                    | 1% | 6  | 870 | 42   | 19512 | 0.0378 | 1.00e+0 | 3.20 | 1.00e+0 | 0.999 | 0.0103  |
| GOTERM_BP_DIRECT | multicellular organismal-level iron ion homeostasis                                    | 0% | 5  | 870 | 29   | 19512 | 0.0383 | 1.00e+0 | 3.87 | 1.00e+0 | 0.999 | 0.00848 |
| GOTERM_BP_DIRECT | positive regulation of ubiquitin-dependent protein catabolic process                   | 0% | 5  | 870 | 29   | 19512 | 0.0383 | 1.00e+0 | 3.87 | 1.00e+0 | 0.999 | 0.00848 |
| GOTERM_BP_DIRECT | negative regulation of myoblast differentiation                                        | 0% | 5  | 870 | 29   | 19512 | 0.0383 | 1.00e+0 | 3.87 | 1.00e+0 | 0.999 | 0.00848 |
| GOTERM_BP_DIRECT | blood vessel development                                                               | 1% | 8  | 870 | 71   | 19512 | 0.0383 | 1.00e+0 | 2.53 | 1.00e+0 | 0.999 | 0.0135  |
| GOTERM_BP_DIRECT | roof of mouth development                                                              | 1% | 8  | 870 | 71   | 19512 | 0.0383 | 1.00e+0 | 2.53 | 1.00e+0 | 0.999 | 0.0135  |
| GOTERM_BP_DIRECT | positive regulation of DNA-templated transcription                                     | 4% | 47 | 870 | 791  | 19512 | 0.0396 | 1.00e+0 | 1.33 | 1.00e+0 | 0.999 | 0.0279  |
| GOTERM_BP_DIRECT | inner ear development                                                                  | 1% | 7  | 870 | 57   | 19512 | 0.0405 | 1.00e+0 | 2.75 | 1.00e+0 | 0.999 | 0.013   |
| GOTERM_BP_DIRECT | positive regulation of SMAD protein signal transduction                                | 1% | 6  | 870 | 43   | 19512 | 0.0412 | 1.00e+0 | 3.13 | 1.00e+0 | 0.999 | 0.0115  |
| GOTERM_BP_DIRECT | positive regulation of bone mineralization                                             | 1% | 6  | 870 | 43   | 19512 | 0.0412 | 1.00e+0 | 3.13 | 1.00e+0 | 0.999 | 0.0115  |
| GOTERM_BP_DIRECT | protein stabilization                                                                  | 2% | 19 | 870 | 259  | 19512 | 0.0423 | 1.00e+0 | 1.65 | 1.00e+0 | 0.999 | 0.0234  |
| GOTERM_BP_DIRECT | sensory perception of sound                                                            | 1% | 14 | 870 | 171  | 19512 | 0.0425 | 1.00e+0 | 1.84 | 1.00e+0 | 0.999 | 0.0211  |
| GOTERM_BP_DIRECT | chondrocyte proliferation                                                              | 0% | 4  | 870 | 18   | 19512 | 0.0436 | 1.00e+0 | 4.98 | 1.00e+0 | 0.999 | 0.00728 |
| GOTERM_BP_DIRECT | viral release from host cell                                                           | 0% | 4  | 870 | 18   | 19512 | 0.0436 | 1.00e+0 | 4.98 | 1.00e+0 | 0.999 | 0.00728 |
| GOTERM_BP_DIRECT | positive regulation of intracellular signal transduction                               | 1% | 6  | 870 | 44   | 19512 | 0.0449 | 1.00e+0 | 3.06 | 1.00e+0 | 0.999 | 0.0128  |
| GOTERM_BP_DIRECT | cell redox homeostasis                                                                 | 1% | 6  | 870 | 44   | 19512 | 0.0449 | 1.00e+0 | 3.06 | 1.00e+0 | 0.999 | 0.0128  |
| GOTERM_BP_DIRECT | positive regulation of cell cycle                                                      | 1% | 6  | 870 | 44   | 19512 | 0.0449 | 1.00e+0 | 3.06 | 1.00e+0 | 0.999 | 0.0128  |
| GOTERM_BP_DIRECT | positive regulation of epithelial cell proliferation                                   | 1% | 8  | 870 | 74   | 19512 | 0.0463 | 1.00e+0 | 2.42 | 1.00e+0 | 0.999 | 0.017   |
| GOTERM_BP_DIRECT | negative regulation of canonical Wnt signaling pathway                                 | 1% | 13 | 870 | 156  | 19512 | 0.0463 | 1.00e+0 | 1.87 | 1.00e+0 | 0.999 | 0.0225  |
| GOTERM_BP_DIRECT | odontoblast differentiation                                                            | 0% | 3  | 870 | 8    | 19512 | 0.0464 | 1.00e+0 | 8.41 | 1.00e+0 | 0.999 | 0.00418 |
| GOTERM_BP_DIRECT | caveola assembly                                                                       | 0% | 3  | 870 | 8    | 19512 | 0.0464 | 1.00e+0 | 8.41 | 1.00e+0 | 0.999 | 0.00418 |
| GOTERM_BP_DIRECT | bone trabecula formation                                                               | 0% | 3  | 870 | 8    | 19512 | 0.0464 | 1.00e+0 | 8.41 | 1.00e+0 | 0.999 | 0.00418 |
| GOTERM_BP_DIRECT | positive regulation of chromatin binding                                               | 0% | 3  | 870 | 8    | 19512 | 0.0464 | 1.00e+0 | 8.41 | 1.00e+0 | 0.999 | 0.00418 |
| GOTERM_BP_DIRECT | positive regulation of skeletal muscle acetylcholine-gated channel clustering          | 0% | 3  | 870 | 8    | 19512 | 0.0464 | 1.00e+0 | 8.41 | 1.00e+0 | 0.999 | 0.00418 |
| GOTERM_BP_DIRECT | pericardium development                                                                | 0% | 3  | 870 | 8    | 19512 | 0.0464 | 1.00e+0 | 8.41 | 1.00e+0 | 0.999 | 0.00418 |
| GOTERM_BP_DIRECT | protein localization to ciliary transition zone                                        | 0% | 3  | 870 | 8    | 19512 | 0.0464 | 1.00e+0 | 8.41 | 1.00e+0 | 0.999 | 0.00418 |
| GOTERM_BP_DIRECT | positive regulation of sprouting angiogenesis                                          | 0% | 5  | 870 | 31   | 19512 | 0.0473 | 1.00e+0 | 3.62 | 1.00e+0 | 0.999 | 0.0113  |
| GOTERM_BP_DIRECT | cellular response to hypoxia                                                           | 1% | 12 | 870 | 140  | 19512 | 0.0484 | 1.00e+0 | 1.92 | 1.00e+0 | 0.999 | 0.0228  |
| GOTERM_BP_DIRECT | establishment or maintenance of cell polarity                                          | 1% | 6  | 870 | 45   | 19512 | 0.0487 | 1.00e+0 | 2.99 | 1.00e+0 | 0.999 | 0.0143  |
| GOTERM_BP_DIRECT | intracellular potassium ion homeostasis                                                | 0% | 4  | 870 | 19   | 19512 | 0.0501 | 1.00e+0 | 4.72 | 1.00e+0 | 0.999 | 0.0089  |
| GOTERM_BP_DIRECT | negative regulation of reactive oxygen species metabolic process                       | 0% | 4  | 870 | 19   | 19512 | 0.0501 | 1.00e+0 | 4.72 | 1.00e+0 | 0.999 | 0.0089  |
| GOTERM_BP_DIRECT | hippocampus development                                                                | 1% | 8  | 870 | 76   | 19512 | 0.0522 | 1.00e+0 | 2.36 | 1.00e+0 | 0.999 | 0.0197  |
| GOTERM_BP_DIRECT | post-transcriptional regulation of gene expression                                     | 0% | 5  | 870 | 32   | 19512 | 0.0523 | 1.00e+0 | 3.50 | 1.00e+0 | 0.999 | 0.0129  |
| GOTERM_BP_DIRECT | positive regulation of macroautophagy                                                  | 0% | 5  | 870 | 32   | 19512 | 0.0523 | 1.00e+0 | 3.50 | 1.00e+0 | 0.999 | 0.0129  |
| GOTERM_BP_DIRECT | transforming growth factor beta receptor signaling pathway                             | 1% | 10 | 870 | 109  | 19512 | 0.0543 | 1.00e+0 | 2.06 | 1.00e+0 | 0.999 | 0.0237  |
| GOTERM_BP_DIRECT | intrinsic apoptotic signaling pathway                                                  | 1% | 6  | 870 | 47   | 19512 | 0.0569 | 1.00e+0 | 2.86 | 1.00e+0 | 0.999 | 0.0175  |
| GOTERM_BP_DIRECT | white fat cell differentiation                                                         | 0% | 4  | 870 | 20   | 19512 | 0.0571 | 1.00e+0 | 4.49 | 1.00e+0 | 0.999 | 0.0107  |
| GOTERM_BP_DIRECT | osteoblast development                                                                 | 0% | 4  | 870 | 20   | 19512 | 0.0571 | 1.00e+0 | 4.49 | 1.00e+0 | 0.999 | 0.0107  |
| GOTERM_BP_DIRECT | fibroblast migration                                                                   | 0% | 4  | 870 | 20   | 19512 | 0.0571 | 1.00e+0 | 4.49 | 1.00e+0 | 0.999 | 0.0107  |
| GOTERM_BP_DIRECT | embryonic forelimb morphogenesis                                                       | 0% | 5  | 870 | 33   | 19512 | 0.0575 | 1.00e+0 | 3.40 | 1.00e+0 | 0.999 | 0.0147  |
| GOTERM_BP_DIRECT | common myeloid progenitor cell proliferation                                           | 0% | 3  | 870 | 9    | 19512 | 0.0579 | 1.00e+0 | 7.48 | 1.00e+0 | 0.999 | 0.00606 |
| GOTERM_BP_DIRECT | regulation of cell communication by electrical coupling involved in cardiac conduction | 0% | 3  | 870 | 9    | 19512 | 0.0579 | 1.00e+0 | 7.48 | 1.00e+0 | 0.999 | 0.00606 |
| GOTERM_BP_DIRECT | regulation of lipid storage                                                            | 0% | 3  | 870 | 9    | 19512 | 0.0579 | 1.00e+0 | 7.48 | 1.00e+0 | 0.999 | 0.00606 |
| GOTERM_BP_DIRECT | cAMP catabolic process                                                                 | 0% | 3  | 870 | 9    | 19512 | 0.0579 | 1.00e+0 | 7.48 | 1.00e+0 | 0.999 | 0.00606 |
| GOTERM_BP_DIRECT | neuroblast proliferation                                                               | 1% | 6  | 870 | 48   | 19512 | 0.0613 | 1.00e+0 | 2.80 | 1.00e+0 | 0.999 | 0.0192  |
| GOTERM_BP_DIRECT | cellular response to growth factor stimulus                                            | 1% | 8  | 870 | 79   | 19512 | 0.0619 | 1.00e+0 | 2.27 | 1.00e+0 | 0.999 | 0.0243  |
| GOTERM_BP_DIRECT | negative regulation of signal transduction                                             | 1% | 8  | 870 | 79   | 19512 | 0.0619 | 1.00e+0 | 2.27 | 1.00e+0 | 0.999 | 0.0243  |
| GOTERM_BP_DIRECT | regulation of protein ubiquitination                                                   | 0% | 4  | 870 | 21   | 19512 | 0.0645 | 1.00e+0 | 4.27 | 1.00e+0 | 0.999 | 0.0128  |
| GOTERM_BP_DIRECT | response to antibiotic                                                                 | 0% | 4  | 870 | 21   | 19512 | 0.0645 | 1.00e+0 | 4.27 | 1.00e+0 | 0.999 | 0.0128  |
| GOTERM_BP_DIRECT | apoptotic process                                                                      | 4% | 46 | 870 | 800  | 19512 | 0.0646 | 1.00e+0 | 1.29 | 1.00e+0 | 0.999 | 0.0471  |
| GOTERM_BP_DIRECT | regulation of transcription by RNA polymerase II                                       | 8% | 87 | 870 | 1643 | 19512 | 0.0659 | 1.00e+0 | 1.19 | 1.00e+0 | 0.999 | 0.0513  |
| GOTERM_BP_DIRECT | skeletal muscle cell differentiation                                                   | 1% | 6  | 870 | 49   | 19512 | 0.0659 | 1.00e+0 | 2.75 | 1.00e+0 | 0.999 | 0.0211  |
| GOTERM_BP_DIRECT | biomineral tissue development                                                          | 0% | 5  | 870 | 35   | 19512 | 0.0687 | 1.00e+0 | 3.20 | 1.00e+0 | 0.999 | 0.0186  |
| GOTERM_BP_DIRECT | positive regulation of neuron apoptotic process                                        | 1% | 7  | 870 | 65   | 19512 | 0.0689 | 1.00e+0 | 2.42 | 1.00e+0 | 0.999 | 0.0253  |
| GOTERM_BP_DIRECT | regulation of cell growth                                                              | 1% | 8  | 870 | 81   | 19512 | 0.069  | 1.00e+0 | 2.22 | 1.00e+0 | 0.999 | 0.0277  |
| GOTERM_BP_DIRECT | membrane repolarization during cardiac muscle cell action potential                    | 0% | 3  | 870 | 10   | 19512 | 0.0703 | 1.00e+0 | 6.73 | 1.00e+0 | 0.999 | 0.00838 |
| GOTERM_BP_DIRECT | mesenchyme development                                                                 | 0% | 3  | 870 | 10   | 19512 | 0.0703 | 1.00e+0 | 6.73 | 1.00e+0 | 0.999 | 0.00838 |
| GOTERM_BP_DIRECT | cardiac muscle cell contraction                                                        | 0% | 3  | 870 | 10   | 19512 | 0.0703 | 1.00e+0 | 6.73 | 1.00e+0 | 0.999 | 0.00838 |
| GOTERM_BP_DIRECT | endochondral bone growth                                                               | 0% | 3  | 870 | 10   | 19512 | 0.0703 | 1.00e+0 | 6.73 | 1.00e+0 | 0.999 | 0.00838 |
| GOTERM_BP_DIRECT | superoxide metabolic process                                                           | 0% | 4  | 870 | 22   | 19512 | 0.0723 | 1.00e+0 | 4.08 | 1.00e+0 | 0.999 | 0.0151  |
| GOTERM_BP_DIRECT | positive regulation of chondrocyte differentiation                                     | 0% | 4  | 870 | 22   | 19512 | 0.0723 | 1.00e+0 | 4.08 | 1.00e+0 | 0.999 | 0.0151  |
| GOTERM_BP_DIRECT | female pregnancy                                                                       | 1% | 8  | 870 | 82   | 19512 | 0.0726 | 1.00e+0 | 2.19 | 1.00e+0 | 0.999 | 0.0296  |
| GOTERM_BP_DIRECT | response to xenobiotic stimulus                                                        | 2% | 18 | 870 | 260  | 19512 | 0.0741 | 1.00e+0 | 1.55 | 1.00e+0 | 0.999 | 0.0438  |
| GOTERM_BP_DIRECT | regulation of multicellular organismal process                                         | 0% | 5  | 870 | 36   | 19512 | 0.0746 | 1.00e+0 | 3.11 | 1.00e+0 | 0.999 | 0.0209  |
| GOTERM_BP_DIRECT | negative regulation of smoothened signaling pathway                                    | 0% | 5  | 870 | 36   | 19512 | 0.0746 | 1.00e+0 | 3.11 | 1.00e+0 | 0.999 | 0.0209  |
| GOTERM_BP_DIRECT | regulation of mitochondrial membrane potential                                         | 0% | 5  | 870 | 36   | 19512 | 0.0746 | 1.00e+0 | 3.11 | 1.00e+0 | 0.999 | 0.0209  |
| GOTERM_BP_DIRECT | response to estrogen                                                                   | 1% | 6  | 870 | 51   | 19512 | 0.0756 | 1.00e+0 | 2.64 | 1.00e+0 | 0.999 | 0.0252  |
| GOTERM_BP_DIRECT | embryonic morphogenesis                                                                | 0% | 4  | 870 | 23   | 19512 | 0.0805 | 1.00e+0 | 3.90 | 1.00e+0 | 0.999 | 0.0177  |
| GOTERM_BP_DIRECT | carbohydrate derivative metabolic process                                              | 0% | 4  | 870 | 23   | 19512 | 0.0805 | 1.00e+0 | 3.90 | 1.00e+0 | 0.999 | 0.0177  |
| GOTERM_BP_DIRECT | regulation of transforming growth factor beta receptor signaling pathway               | 0% | 4  | 870 | 23   | 19512 | 0.0805 | 1.00e+0 | 3.90 | 1.00e+0 | 0.999 | 0.0177  |
| GOTERM_BP_DIRECT | positive regulation of autophagosome assembly                                          | 0% | 4  | 870 | 23   | 19512 | 0.0805 | 1.00e+0 | 3.90 | 1.00e+0 | 0.999 | 0.0177  |
| GOTERM_BP_DIRECT | male gonad development                                                                 | 1% | 10 | 870 | 118  | 19512 | 0.0807 | 1.00e+0 | 1.90 | 1.00e+0 | 0.999 | 0.0381  |
| GOTERM_BP_DIRECT | aortic valve morphogenesis                                                             | 0% | 5  | 870 | 37   | 19512 | 0.0809 | 1.00e+0 | 3.03 | 1.00e+0 | 0.999 | 0.0233  |
| GOTERM_BP_DIRECT | negative regulation of cardiac muscle cell apoptotic process                           | 0% | 5  | 870 | 37   | 19512 | 0.0809 | 1.00e+0 | 3.03 | 1.00e+0 | 0.999 | 0.0233  |
| GOTERM_BP_DIRECT | blood vessel diameter maintenance                                                      | 0% | 5  | 870 | 37   | 19512 | 0.0809 | 1.00e+0 | 3.03 | 1.00e+0 | 0.999 | 0.0233  |
| GOTERM_BP_DIRECT | positive regulation of cell migration involved in sprouting angiogenesis               | 0% | 5  | 870 | 37   | 19512 | 0.0809 | 1.00e+0 | 3.03 | 1.00e+0 | 0.999 | 0.0233  |
| GOTERM_BP_DIRECT | cilium assembly                                                                        | 2% | 17 | 870 | 244  | 19512 | 0.0815 | 1.00e+0 | 1.56 | 1.00e+0 | 0.999 | 0.0463  |
| GOTERM_BP_DIRECT | cellular response to amino acid starvation                                             | 1% | 7  | 870 | 68   | 19512 | 0.0818 | 1.00e+0 | 2.31 | 1.00e+0 | 0.999 | 0.0314  |
| GOTERM_BP_DIRECT | cellular response to amino acid stimulus                                               | 1% | 7  | 870 | 68   | 19512 | 0.0818 | 1.00e+0 | 2.31 | 1.00e+0 | 0.999 | 0.0314  |
| GOTERM_BP_DIRECT | protein-containing complex assembly                                                    | 1% | 12 | 870 | 154  | 19512 | 0.0832 | 1.00e+0 | 1.75 | 1.00e+0 | 0.999 | 0.043   |
| GOTERM_BP_DIRECT | mitral valve morphogenesis                                                             | 0% | 3  | 870 | 11   | 19512 | 0.0835 | 1.00e+0 | 6.12 | 1.00e+0 | 0.999 | 0.0111  |
| GOTERM_BP_DIRECT | thymocyte apoptotic process                                                            | 0% | 3  | 870 | 11   | 19512 | 0.0835 | 1.00e+0 | 6.12 | 1.00e+0 | 0.999 | 0.0111  |
| GOTERM_BP_DIRECT | determination of left/right asymmetry in lateral mesoderm                              | 0% | 3  | 870 | 11   | 19512 | 0.0835 | 1.00e+0 | 6.12 | 1.00e+0 | 0.999 | 0.0111  |
| GOTERM_BP_DIRECT | branching involved in mammary gland duct morphogenesis                                 | 0% | 3  | 870 | 11   | 19512 | 0.0835 | 1.00e+0 | 6.12 | 1.00e+0 | 0.999 | 0.0111  |
| GOTERM_BP_DIRECT | positive regulation of peroxisome proliferator activated receptor signaling pathway    | 0% | 3  | 870 | 11   | 19512 | 0.0835 | 1.00e+0 | 6    |         |       |         |

|                  |                                                              |    |    |     |     |       |        |         |       |         |       |         |
|------------------|--------------------------------------------------------------|----|----|-----|-----|-------|--------|---------|-------|---------|-------|---------|
| GOTERM_BP_DIRECT | corticosterone secretion                                     | 0% | 2  | 870 | 2   | 19512 | 0.0871 | 1.00e+0 | 22.43 | 1.00e+0 | 0.999 | 0.00199 |
| GOTERM_BP_DIRECT | L-tryptophan transmembrane transport                         | 0% | 2  | 870 | 2   | 19512 | 0.0871 | 1.00e+0 | 22.43 | 1.00e+0 | 0.999 | 0.00199 |
| GOTERM_BP_DIRECT | detoxification of nitrogen compound                          | 0% | 2  | 870 | 2   | 19512 | 0.0871 | 1.00e+0 | 22.43 | 1.00e+0 | 0.999 | 0.00199 |
| GOTERM_BP_DIRECT | follicle-stimulating hormone secretion                       | 0% | 2  | 870 | 2   | 19512 | 0.0871 | 1.00e+0 | 22.43 | 1.00e+0 | 0.999 | 0.00199 |
| GOTERM_BP_DIRECT | DNA replication preinitiation complex assembly               | 0% | 2  | 870 | 2   | 19512 | 0.0871 | 1.00e+0 | 22.43 | 1.00e+0 | 0.999 | 0.00199 |
| GOTERM_BP_DIRECT | negative regulation of programmed necrotic cell death        | 0% | 2  | 870 | 2   | 19512 | 0.0871 | 1.00e+0 | 22.43 | 1.00e+0 | 0.999 | 0.00199 |
| GOTERM_BP_DIRECT | regulation of mitochondrial DNA metabolic process            | 0% | 2  | 870 | 2   | 19512 | 0.0871 | 1.00e+0 | 22.43 | 1.00e+0 | 0.999 | 0.00199 |
| GOTERM_BP_DIRECT | negative regulation of relaxation of cardiac muscle          | 0% | 2  | 870 | 2   | 19512 | 0.0871 | 1.00e+0 | 22.43 | 1.00e+0 | 0.999 | 0.00199 |
| GOTERM_BP_DIRECT | negative regulation of DNA-templated DNA replication         | 0% | 2  | 870 | 2   | 19512 | 0.0871 | 1.00e+0 | 22.43 | 1.00e+0 | 0.999 | 0.00199 |
| GOTERM_BP_DIRECT | negative regulation of endothelial cell apoptotic process    | 0% | 5  | 870 | 38  | 19512 | 0.0874 | 1.00e+0 | 2.95  | 1.00e+0 | 0.999 | 0.0258  |
| GOTERM_BP_DIRECT | phosphatidylinositol metabolic process                       | 0% | 5  | 870 | 38  | 19512 | 0.0874 | 1.00e+0 | 2.95  | 1.00e+0 | 0.999 | 0.0258  |
| GOTERM_BP_DIRECT | Notch signaling pathway                                      | 1% | 10 | 870 | 120 | 19512 | 0.0875 | 1.00e+0 | 1.87  | 1.00e+0 | 0.999 | 0.042   |
| GOTERM_BP_DIRECT | positive regulation of cell differentiation                  | 1% | 8  | 870 | 86  | 19512 | 0.0886 | 1.00e+0 | 2.09  | 1.00e+0 | 0.999 | 0.0378  |
| GOTERM_BP_DIRECT | uterus development                                           | 0% | 4  | 870 | 24  | 19512 | 0.089  | 1.00e+0 | 3.74  | 1.00e+0 | 0.999 | 0.0205  |
| GOTERM_BP_DIRECT | embryo development ending in birth or egg hatching           | 0% | 4  | 870 | 24  | 19512 | 0.089  | 1.00e+0 | 3.74  | 1.00e+0 | 0.999 | 0.0205  |
| GOTERM_BP_DIRECT | regulation of proteasomal protein catabolic process          | 0% | 4  | 870 | 24  | 19512 | 0.089  | 1.00e+0 | 3.74  | 1.00e+0 | 0.999 | 0.0205  |
| GOTERM_BP_DIRECT | negative regulation of keratinocyte proliferation            | 0% | 4  | 870 | 24  | 19512 | 0.089  | 1.00e+0 | 3.74  | 1.00e+0 | 0.999 | 0.0205  |
| GOTERM_BP_DIRECT | phosphatidylinositol-mediated signaling                      | 0% | 4  | 870 | 24  | 19512 | 0.089  | 1.00e+0 | 3.74  | 1.00e+0 | 0.999 | 0.0205  |
| GOTERM_BP_DIRECT | cell population proliferation                                | 2% | 18 | 870 | 267 | 19512 | 0.0893 | 1.00e+0 | 1.51  | 1.00e+0 | 0.999 | 0.0542  |
| GOTERM_BP_DIRECT | negative regulation of cell growth                           | 1% | 10 | 870 | 121 | 19512 | 0.091  | 1.00e+0 | 1.85  | 1.00e+0 | 0.999 | 0.0441  |
| GOTERM_BP_DIRECT | transcription by RNA polymerase II                           | 2% | 18 | 870 | 268 | 19512 | 0.0926 | 1.00e+0 | 1.51  | 1.00e+0 | 0.999 | 0.0561  |
| GOTERM_BP_DIRECT | regulation of cytosolic calcium ion concentration            | 0% | 5  | 870 | 39  | 19512 | 0.0941 | 1.00e+0 | 2.88  | 1.00e+0 | 0.999 | 0.0286  |
| GOTERM_BP_DIRECT | lipid metabolic process                                      | 4% | 47 | 870 | 847 | 19512 | 0.0954 | 1.00e+0 | 1.24  | 1.00e+0 | 0.999 | 0.0709  |
| GOTERM_BP_DIRECT | cellular response to hydrogen peroxide                       | 1% | 7  | 870 | 71  | 19512 | 0.0961 | 1.00e+0 | 2.21  | 1.00e+0 | 0.999 | 0.0385  |
| GOTERM_BP_DIRECT | system development                                           | 1% | 8  | 870 | 88  | 19512 | 0.0972 | 1.00e+0 | 2.04  | 1.00e+0 | 0.999 | 0.0424  |
| GOTERM_BP_DIRECT | stem cell proliferation                                      | 1% | 6  | 870 | 55  | 19512 | 0.0973 | 1.00e+0 | 2.45  | 1.00e+0 | 0.999 | 0.035   |
| GOTERM_BP_DIRECT | glycosaminoglycan metabolic process                          | 0% | 3  | 870 | 12  | 19512 | 0.0973 | 1.00e+0 | 5.61  | 1.00e+0 | 0.999 | 0.0144  |
| GOTERM_BP_DIRECT | ER overload response                                         | 0% | 3  | 870 | 12  | 19512 | 0.0973 | 1.00e+0 | 5.61  | 1.00e+0 | 0.999 | 0.0144  |
| GOTERM_BP_DIRECT | cellular response to electrical stimulus                     | 0% | 3  | 870 | 12  | 19512 | 0.0973 | 1.00e+0 | 5.61  | 1.00e+0 | 0.999 | 0.0144  |
| GOTERM_BP_DIRECT | negative regulation of axonogenesis                          | 0% | 3  | 870 | 12  | 19512 | 0.0973 | 1.00e+0 | 5.61  | 1.00e+0 | 0.999 | 0.0144  |
| GOTERM_BP_DIRECT | cerebellar Purkinje cell layer development                   | 0% | 3  | 870 | 12  | 19512 | 0.0973 | 1.00e+0 | 5.61  | 1.00e+0 | 0.999 | 0.0144  |
| GOTERM_BP_DIRECT | osteoblast proliferation                                     | 0% | 3  | 870 | 12  | 19512 | 0.0973 | 1.00e+0 | 5.61  | 1.00e+0 | 0.999 | 0.0144  |
| GOTERM_BP_DIRECT | myoblast proliferation                                       | 0% | 3  | 870 | 12  | 19512 | 0.0973 | 1.00e+0 | 5.61  | 1.00e+0 | 0.999 | 0.0144  |
| GOTERM_BP_DIRECT | response to selenium ion                                     | 0% | 3  | 870 | 12  | 19512 | 0.0973 | 1.00e+0 | 5.61  | 1.00e+0 | 0.999 | 0.0144  |
| GOTERM_BP_DIRECT | negative regulation of intrinsic apoptotic signaling pathway | 0% | 4  | 870 | 25  | 19512 | 0.098  | 1.00e+0 | 3.59  | 1.00e+0 | 0.999 | 0.0235  |
| GOTERM_BP_DIRECT | release of cytochrome c from mitochondria                    | 0% | 4  | 870 | 25  | 19512 | 0.098  | 1.00e+0 | 3.59  | 1.00e+0 | 0.999 | 0.0235  |
| GOTERM_BP_DIRECT | regulation of protein metabolic process                      | 0% | 4  | 870 | 25  | 19512 | 0.098  | 1.00e+0 | 3.59  | 1.00e+0 | 0.999 | 0.0235  |
| GOTERM_BP_DIRECT | central nervous system development                           | 1% | 12 | 870 | 159 | 19512 | 0.0986 | 1.00e+0 | 1.69  | 1.00e+0 | 0.999 | 0.0526  |

| GO with upregulated genes |                                                                                           |       |       |            |          |           |          |           |             |            |         |              |  |
|---------------------------|-------------------------------------------------------------------------------------------|-------|-------|------------|----------|-----------|----------|-----------|-------------|------------|---------|--------------|--|
| Category                  | Term                                                                                      | Genes | Count | List Total | Pop Hits | Pop Total | P-Value  | Benjamini | Fold Enrich | Bonferroni | FDR     | Fisher Exact |  |
| GOTERM_BP_DIRECT          | RNA processing                                                                            | 5%    | 44    | 720        | 601      | 19512     | 2.74E-05 | 0.0896    | 1.98        | 0.0857     | 0.0896  | 1.31E-05     |  |
| GOTERM_BP_DIRECT          | connective tissue replacement involved in inflammatory response                           |       |       |            |          |           |          |           |             |            |         |              |  |
| GOTERM_BP_DIRECT          | wound healing                                                                             | 0%    | 4     | 720        | 5        | 19512     | 0.000471 | 0.537     | 21.68       | 0.786      | 0.537   | 8.93E-06     |  |
| GOTERM_BP_DIRECT          | intracellular signal transduction                                                         | 4%    | 35    | 720        | 501      | 19512     | 0.000492 | 0.537     | 1.89        | 0.8        | 0.537   | 0.000246     |  |
| GOTERM_BP_DIRECT          | response to muscle activity                                                               | 1%    | 7     | 720        | 30       | 19512     | 0.000683 | 0.559     | 6.32        | 0.893      | 0.559   | 8.77E-05     |  |
| GOTERM_BP_DIRECT          | semaphorin-plexin signaling pathway                                                       | 1%    | 8     | 720        | 45       | 19512     | 0.0012   | 0.691     | 4.82        | 0.98       | 0.691   | 0.000212     |  |
| GOTERM_BP_DIRECT          | angiogenesis                                                                              | 3%    | 23    | 720        | 292      | 19512     | 0.00127  | 0.691     | 2.13        | 0.984      | 0.691   | 0.000552     |  |
| GOTERM_BP_DIRECT          | protein phosphorylation                                                                   | 2%    | 21    | 720        | 261      | 19512     | 0.00168  | 0.788     | 2.18        | 0.996      | 0.788   | 0.000719     |  |
| GOTERM_BP_DIRECT          | activation of GTPase activity                                                             | 1%    | 6     | 720        | 26       | 19512     | 0.00231  | 0.947     | 6.25        | 0.999      | 0.947   | 0.000302     |  |
| GOTERM_BP_DIRECT          | positive regulation of transcription by RNA polymerase II                                 | 8%    | 66    | 720        | 1243     | 19512     | 0.00278  | 0.949     | 1.44        | 1.00E+0    | 0.949   | 0.00182      |  |
| GOTERM_BP_DIRECT          | neutrophil activation                                                                     | 1%    | 5     | 720        | 17       | 19512     | 0.00297  | 0.949     | 7.97        | 1.00E+0    | 0.949   | 0.000288     |  |
| GOTERM_BP_DIRECT          | response to xenobiotic stimulus                                                           | 2%    | 20    | 720        | 260      | 19512     | 0.00369  | 0.949     | 2.08        | 1.00E+0    | 0.949   | 0.00164      |  |
| GOTERM_BP_DIRECT          | glucose homeostasis                                                                       | 2%    | 13    | 720        | 135      | 19512     | 0.00425  | 0.949     | 2.61        | 1.00E+0    | 0.949   | 0.00148      |  |
| GOTERM_BP_DIRECT          | positive regulation of interleukin-6 production                                           | 1%    | 11    | 720        | 103      | 19512     | 0.00469  | 0.949     | 2.89        | 1.00E+0    | 0.949   | 0.00146      |  |
| GOTERM_BP_DIRECT          | interleukin-17-mediated signaling pathway                                                 | 0%    | 4     | 720        | 10       | 19512     | 0.00492  | 0.949     | 10.84       | 1.00E+0    | 0.949   | 0.000323     |  |
| GOTERM_BP_DIRECT          | inflammatory response                                                                     | 4%    | 30    | 720        | 474      | 19512     | 0.00554  | 0.949     | 1.72        | 1.00E+0    | 0.949   | 0.00302      |  |
| GOTERM_BP_DIRECT          | monoatomic ion transport                                                                  | 5%    | 39    | 720        | 672      | 19512     | 0.00617  | 0.949     | 1.57        | 1.00E+0    | 0.949   | 0.0036       |  |
| GOTERM_BP_DIRECT          | positive regulation of apoptotic process                                                  | 3%    | 23    | 720        | 333      | 19512     | 0.00622  | 0.949     | 1.87        | 1.00E+0    | 0.949   | 0.00309      |  |
| GOTERM_BP_DIRECT          | positive regulation of inflammatory response                                              | 1%    | 12    | 720        | 125      | 19512     | 0.00652  | 0.949     | 2.60        | 1.00E+0    | 0.949   | 0.00228      |  |
| GOTERM_BP_DIRECT          | negative regulation of platelet aggregation                                               | 0%    | 4     | 720        | 11       | 19512     | 0.00659  | 0.949     | 9.85        | 1.00E+0    | 0.949   | 0.00493      |  |
| GOTERM_BP_DIRECT          | negative regulation of catalytic activity                                                 | 0%    | 4     | 720        | 11       | 19512     | 0.00659  | 0.949     | 9.85        | 1.00E+0    | 0.949   | 0.00493      |  |
| GOTERM_BP_DIRECT          | positive regulation of canonical NF-kappaB signal transduction                            | 2%    | 18    | 720        | 236      | 19512     | 0.0067   | 0.949     | 2.07        | 1.00E+0    | 0.949   | 0.003        |  |
| GOTERM_BP_DIRECT          | cellular response to vascular endothelial growth factor stimulus                          | 1%    | 6     | 720        | 33       | 19512     | 0.00676  | 0.949     | 4.93        | 1.00E+0    | 0.949   | 0.00117      |  |
| GOTERM_BP_DIRECT          | positive regulation of macromolecule metabolic process                                    | 1%    | 6     | 720        | 33       | 19512     | 0.00676  | 0.949     | 4.93        | 1.00E+0    | 0.949   | 0.00117      |  |
| GOTERM_BP_DIRECT          | positive regulation of miRNA transcription                                                | 1%    | 8     | 720        | 61       | 19512     | 0.00695  | 0.949     | 3.55        | 1.00E+0    | 0.949   | 0.00173      |  |
| GOTERM_BP_DIRECT          | triglyceride biosynthetic process                                                         | 1%    | 5     | 720        | 22       | 19512     | 0.00788  | 0.999     | 6.16        | 1.00E+0    | 0.999   | 0.00105      |  |
| GOTERM_BP_DIRECT          | response to virus                                                                         | 1%    | 12    | 720        | 129      | 19512     | 0.00821  | 0.999     | 2.52        | 1.00E+0    | 0.999   | 0.00296      |  |
| GOTERM_BP_DIRECT          | skin morphogenesis                                                                        | 0%    | 4     | 720        | 12       | 19512     | 0.00854  | 0.999     | 9.03        | 1.00E+0    | 0.999   | 0.000718     |  |
| GOTERM_BP_DIRECT          | negative regulation of cardiac muscle hypertrophy in response to stress                   | 0%    | 4     | 720        | 12       | 19512     | 0.00854  | 0.999     | 9.03        | 1.00E+0    | 0.999   | 0.000718     |  |
| GOTERM_BP_DIRECT          | SMAD protein signal transduction                                                          | 1%    | 5     | 720        | 23       | 19512     | 0.00926  | 1.00E+0   | 5.89        | 1.00E+0    | 1.00E+0 | 0.00131      |  |
| GOTERM_BP_DIRECT          | positive regulation of ERK1 and ERK2 cascade                                              | 2%    | 16    | 720        | 207      | 19512     | 0.00995  | 1.00E+0   | 2.09        | 1.00E+0    | 1.00E+0 | 0.00438      |  |
| GOTERM_BP_DIRECT          | positive regulation of glycolytic process                                                 | 1%    | 5     | 720        | 24       | 19512     | 0.0108   | 1.00E+0   | 5.65        | 1.00E+0    | 1.00E+0 | 0.0016       |  |
| GOTERM_BP_DIRECT          | response to immobilization stress                                                         | 1%    | 5     | 720        | 24       | 19512     | 0.0108   | 1.00E+0   | 5.65        | 1.00E+0    | 1.00E+0 | 0.0016       |  |
| GOTERM_BP_DIRECT          | positive regulation of phagocytosis, engulfment                                           | 0%    | 4     | 720        | 13       | 19512     | 0.0108   | 1.00E+0   | 8.34        | 1.00E+0    | 1.00E+0 | 0.00101      |  |
| GOTERM_BP_DIRECT          | T-helper 17 type immune response                                                          | 0%    | 3     | 720        | 5        | 19512     | 0.0126   | 1.00E+0   | 16.26       | 1.00E+0    | 1.00E+0 | 0.000473     |  |
| GOTERM_BP_DIRECT          | negative regulation of inflammatory response                                              | 2%    | 13    | 720        | 156      | 19512     | 0.0129   | 1.00E+0   | 2.26        | 1.00E+0    | 1.00E+0 | 0.00523      |  |
| GOTERM_BP_DIRECT          | embryonic skeletal system morphogenesis                                                   | 1%    | 7     | 720        | 53       | 19512     | 0.0129   | 1.00E+0   | 3.58        | 1.00E+0    | 1.00E+0 | 0.00319      |  |
| GOTERM_BP_DIRECT          | CDP-diacylglycerol biosynthetic process                                                   | 0%    | 4     | 720        | 14       | 19512     | 0.0134   | 1.00E+0   | 7.74        | 1.00E+0    | 1.00E+0 | 0.00137      |  |
| GOTERM_BP_DIRECT          | positive regulation of smooth muscle cell differentiation                                 | 0%    | 4     | 720        | 14       | 19512     | 0.0134   | 1.00E+0   | 7.74        | 1.00E+0    | 1.00E+0 | 0.00137      |  |
| GOTERM_BP_DIRECT          | cytoskeleton-dependent intracellular transport                                            | 0%    | 4     | 720        | 14       | 19512     | 0.0134   | 1.00E+0   | 7.74        | 1.00E+0    | 1.00E+0 | 0.00137      |  |
| GOTERM_BP_DIRECT          | negative regulation of ERK1 and ERK2 cascade                                              | 1%    | 9     | 720        | 86       | 19512     | 0.0139   | 1.00E+0   | 2.84        | 1.00E+0    | 1.00E+0 | 0.00441      |  |
| GOTERM_BP_DIRECT          | lung morphogenesis                                                                        | 1%    | 5     | 720        | 26       | 19512     | 0.0143   | 1.00E+0   | 5.21        | 1.00E+0    | 1.00E+0 | 0.00233      |  |
| GOTERM_BP_DIRECT          | negative regulation of Ras protein signal transduction                                    | 1%    | 5     | 720        | 26       | 19512     | 0.0143   | 1.00E+0   | 5.21        | 1.00E+0    | 1.00E+0 | 0.00233      |  |
| GOTERM_BP_DIRECT          | positive regulation of phosphatidylinositol 3-kinase/protein kinase B signal transduction | 2%    | 16    | 720        | 217      | 19512     | 0.0148   | 1.00E+0   | 2.00        | 1.00E+0    | 1.00E+0 | 0.00683      |  |
| GOTERM_BP_DIRECT          | monoatomic anion transmembrane transport                                                  | 1%    | 6     | 720        | 40       | 19512     | 0.0152   | 1.00E+0   | 4.07        | 1.00E+0    | 1.00E+0 | 0.00325      |  |
| GOTERM_BP_DIRECT          | transforming growth factor beta receptor superfamily signaling pathway                    | 0%    | 4     | 720        | 15       | 19512     | 0.0163   | 1.00E+0   | 7.23        | 1.00E+0    | 1.00E+0 | 0.00181      |  |
| GOTERM_BP_DIRECT          | retina vasculature development in camera-type eye                                         | 0%    | 4     | 720        | 15       | 19512     | 0.0163   | 1.00E+0   | 7.23        | 1.00E+0    | 1.00E+0 | 0.00181      |  |
| GOTERM_BP_DIRECT          | positive regulation of fatty acid biosynthetic process                                    | 0%    | 4     | 720        | 15       | 19512     | 0.0163   | 1.00E+0   | 7.23        | 1.00E+0    | 1.00E+0 | 0.00181      |  |
| GOTERM_BP_DIRECT          | epithelial structure maintenance                                                          | 0%    | 4     | 720        | 15       | 19512     | 0.0163   | 1.00E+0   | 7.23        | 1.00E+0    | 1.00E+0 | 0.00181      |  |
| GOTERM_BP_DIRECT          | regulation of glucose metabolic process                                                   | 1%    | 5     | 720        | 27       | 19512     | 0.0163   | 1.00E+0   | 5.02        | 1.00E+0    | 1.00E+0 | 0.00277      |  |
| GOTERM_BP_DIRECT          | negative regulation of proteolysis                                                        | 1%    | 5     | 720        | 27       | 19512     | 0.0163   | 1.00E+0   | 5.02        | 1.00E+0    | 1.00E+0 | 0.00277      |  |
| GOTERM_BP_DIRECT          | negative regulation of cell population proliferation                                      | 3%    | 27    | 720        | 450      | 19512     | 0.0165   | 1.00E+0   | 1.63        | 1.00E+0    | 1.00E+0 | 0.00936      |  |
| GOTERM_BP_DIRECT          | response to cytokine                                                                      | 1%    | 7     | 720        | 56       | 19512     | 0.0167   | 1.00E+0   | 3.39        | 1.00E+0    | 1.00E+0 | 0.00436      |  |
| GOTERM_BP_DIRECT          | cell surface receptor protein tyrosine kinase signaling pathway                           | 1%    | 11    | 720        | 125      | 19512     | 0.0173   | 1.00E+0   | 2.38        | 1.00E+0    | 1.00E+0 | 0.00659      |  |
| GOTERM_BP_DIRECT          | positive regulation of lipid metabolic process                                            | 0%    | 3     | 720        | 6        | 19512     | 0.0184   | 1.00E+0   | 13.55       | 1.00E+0    | 1.00E+0 | 0.00921      |  |
| GOTERM_BP_DIRECT          | interleukin-1-mediated signaling pathway                                                  | 1%    | 5     | 720        | 28       | 19512     | 0.0185   | 1.00E+0   | 4.84        | 1.00E+0    | 1.00E+0 | 0.00327      |  |
| GOTERM_BP_DIRECT          | MyD88-dependent toll-like receptor signaling pathway                                      | 0%    | 4     | 720        | 16       | 19512     | 0.0195   | 1.00E+0   | 6.78        | 1.00E+0    | 1.00E+0 | 0.00235      |  |
| GOTERM_BP_DIRECT          | positive regulation of SMAD protein signal transduction                                   | 1%    | 6     | 720        | 43       | 19512     | 0.0203   | 1.00E+0   | 3.78        | 1.00E+0    | 1.00E+0 | 0.00471      |  |
| GOTERM_BP_DIRECT          | regulation of exocytosis                                                                  | 1%    | 5     | 720        | 29       | 19512     | 0.0209   | 1.00E+0   | 4.67        | 1.00E+0    | 1.00E+0 | 0.00384      |  |
| GOTERM_BP_DIRECT          | animal organ regeneration                                                                 | 1%    | 5     | 720        | 29       | 19512     | 0.0209   | 1.00E+0   | 4.67        | 1.00E+0    | 1.00E+0 | 0.00384      |  |
| GOTERM_BP_DIRECT          | type I interferon-mediated signaling pathway                                              | 1%    | 7     | 720        | 60       | 19512     | 0.0228   | 1.00E+0   | 3.16        | 1.00E+0    | 1.00E+0 | 0.0064       |  |
| GOTERM_BP_DIRECT          | intracellular glucose homeostasis                                                         | 1%    | 5     | 720        | 30       | 19512     | 0.0234   | 1.00E+0   | 4.52        | 1.00E+0    | 1.00E+0 | 0.00447      |  |
| GOTERM_BP_DIRECT          | innate immune response                                                                    | 4%    | 34    | 720        | 621      | 19512     | 0.0238   | 1.00E+0   | 1.48        | 1.00E+0    | 1.00E+0 | 0.0144       |  |
| GOTERM_BP_DIRECT          | connective tissue development                                                             | 0%    | 3     | 720        | 7        | 19512     | 0.0252   | 1.00E+0   | 11.61       | 1.00E+0    | 1.00E+0 | 0.00157      |  |
| GOTERM_BP_DIRECT          | negative regulation of plasminogen activation                                             | 0%    | 3     | 720        | 7        | 19512     | 0.0252   | 1.00E+0   | 11.61       | 1.00E+0    | 1.00E+0 | 0.00157      |  |
| GOTERM_BP_DIRECT          | lipid modification                                                                        | 0%    | 3     | 720        | 7        | 19512     | 0.0252   | 1.00E+0   | 11.61       | 1.00E+0    | 1.00E+0 | 0.00157      |  |
| GOTERM_BP_DIRECT          | glandular epithelial cell maturation                                                      | 0%    | 3     | 720        | 7        | 19512     | 0.0252   | 1.00E+0   | 11.61       | 1.00E+0    | 1.00E+0 | 0.00157      |  |
| GOTERM_BP_DIRECT          | negative regulation of response to endoplasmic reticulum stress                           | 0%    | 3     | 720        | 7        | 19512     | 0.0252   | 1.00E+0   | 11.61       | 1.00E+0    | 1.00E+0 | 0.00157      |  |
| GOTERM_BP_DIRECT          | cellular response to growth factor stimulus                                               | 1%    | 8     | 720        | 79       | 19512     | 0.0263   | 1.00E+0   | 2.74        | 1.00E+0    | 1.00E+0 | 0.00861      |  |
| GOTERM_BP_DIRECT          | cytokine-mediated signaling pathway                                                       | 1%    | 12    | 720        | 153      | 19512     | 0.0263   | 1.00E+0   | 2.13        | 1.00E+0    | 1.00E+0 | 0.0113       |  |
| GOTERM_BP_DIRECT          | negative regulation of collagen biosynthetic process                                      | 0%    | 4     | 720        | 18       | 19512     | 0.0269   | 1.00E+0   | 6.02        | 1.00E+0    | 1.00E+0 | 0.00372      |  |
| GOTERM_BP_DIRECT          | receptor-mediated endocytosis                                                             | 1%    | 8     | 720        | 80       | 19512     | 0.028    | 1.00E+0   | 2.71        | 1.00E+0    | 1.00E+0 | 0.00926      |  |
| GOTERM_BP_DIRECT          | neural crest cell migration                                                               | 1%    | 6     | 720        | 47       | 19512     | 0.0287   | 1.00E+0   | 3.46        | 1.00E+0    | 1.00E+0 | 0.00732      |  |
| GOTERM_BP_DIRECT          | viral protein processing                                                                  | 1%    | 5     | 720        | 32       | 19512     | 0.029    | 1.00E+0   | 4.23        | 1.00E+0    | 1.00E+0 | 0.00594      |  |
| GOTERM_BP_DIRECT          | protein localization to plasma membrane                                                   | 1%    | 12    | 720        | 156      | 19512     | 0.0298   | 1.00E+0   | 2.08        | 1.00E+0    | 1.00E+0 | 0.013        |  |
| GOTERM_BP_DIRECT          | positive regulation of cell migration                                                     | 2%    | 19    | 720        | 300      | 19512     | 0.0299   | 1.00E+0   | 1.72        | 1.00E+0    | 1.00E+0 | 0.0162       |  |
| GOTERM_BP_DIRECT          | exocytosis                                                                                | 1%    | 11    | 720        | 137      | 19512     | 0.0304   | 1.00E+0   | 2.18        | 1.00E+0    | 1.00E+0 | 0.0127       |  |
| GOTERM_BP_DIRECT          | long-chain fatty-acyl-CoA biosynthetic process                                            | 0%    | 4     | 720        | 19       | 19512     | 0.0311   | 1.00E+0   | 5.71        | 1.00E+0    | 1.00E+0 | 0.00458      |  |
| GOTERM_BP_DIRECT          | muscle structure development                                                              | 0%    | 4     | 720        | 19       | 19512     | 0.0311   | 1.00E+0   | 5.71        | 1.00E+0    | 1.00E+0 | 0.00458      |  |
| GOTERM_BP_DIRECT          | axon guidance                                                                             | 2%    | 14    | 720        | 198      | 19512     | 0.0321   | 1.00E+0   | 1.92        | 1.00E+0    | 1.00E+0 | 0.0154       |  |
| GOTERM_BP_DIRECT          | negative regulation of MAPK cascade                                                       | 1%    | 7     | 720        | 65       | 19512     | 0.0322   | 1.00E+0   | 2.92        | 1.00E+0    | 1.00E+0 | 0.00986      |  |
| GOTERM_BP_DIRECT          | negative regulation of type II interferon-mediated signaling pathway                      | 0%    | 3     | 720        | 8        | 19512     | 0.0328   | 1.00E+0   | 10.16       | 1.00E+0    | 1.00E+0 | 0.00244      |  |
| GOTERM_BP_DIRECT          | regulation of D-glucose import                                                            | 0%    | 3     | 720        | 8        | 19512     | 0.0328   | 1.00E+0   | 10.16       | 1.00E+0    | 1.00E+0 | 0.00244      |  |
| GOTERM_BP_DIRECT          | Notch signaling pathway                                                                   | 1%    | 10    | 720        | 120      | 19512     | 0.0334   | 1.00E+0   | 2.26        | 1.00E+0    | 1.00E+0 | 0.0134       |  |
| GOTERM_BP_DIRECT          | positive regulation of chemokine production                                               | 1%    | 6     | 720        | 49       | 19512     | 0        |           |             |            |         |              |  |

|                  |                                                                            |    |    |     |      |       |        |         |       |         |         |         |
|------------------|----------------------------------------------------------------------------|----|----|-----|------|-------|--------|---------|-------|---------|---------|---------|
| GOTERM_BP_DIRECT | MAPK cascade                                                               | 1% | 11 | 720 | 145  | 19512 | 0.0422 | 1.00e+0 | 2.06  | 1.00e+0 | 1.00e+0 | 0.0187  |
| GOTERM_BP_DIRECT | regulation of multicellular organismal process                             | 1% | 5  | 720 | 36   | 19512 | 0.0424 | 1.00e+0 | 3.76  | 1.00e+0 | 1.00e+0 | 0.00986 |
| GOTERM_BP_DIRECT | establishment of endothelial barrier                                       | 0% | 4  | 720 | 22   | 19512 | 0.0456 | 1.00e+0 | 4.93  | 1.00e+0 | 1.00e+0 | 0.00791 |
| GOTERM_BP_DIRECT | lipid metabolic process                                                    | 5% | 42 | 720 | 847  | 19512 | 0.0461 | 1.00e+0 | 1.34  | 1.00e+0 | 1.00e+0 | 0.0321  |
| GOTERM_BP_DIRECT | aortic valve morphogenesis                                                 | 1% | 5  | 720 | 37   | 19512 | 0.0462 | 1.00e+0 | 3.66  | 1.00e+0 | 1.00e+0 | 0.0111  |
| GOTERM_BP_DIRECT | blood vessel development                                                   | 1% | 7  | 720 | 71   | 19512 | 0.0466 | 1.00e+0 | 2.67  | 1.00e+0 | 1.00e+0 | 0.0156  |
| GOTERM_BP_DIRECT | vasodilation                                                               | 1% | 6  | 720 | 54   | 19512 | 0.0481 | 1.00e+0 | 3.01  | 1.00e+0 | 1.00e+0 | 0.0142  |
| GOTERM_BP_DIRECT | transforming growth factor beta receptor signaling pathway                 | 1% | 9  | 720 | 109  | 19512 | 0.0483 | 1.00e+0 | 2.24  | 1.00e+0 | 1.00e+0 | 0.0195  |
| GOTERM_BP_DIRECT | endothelial cell chemotaxis                                                | 0% | 3  | 720 | 10   | 19512 | 0.0501 | 1.00e+0 | 8.13  | 1.00e+0 | 1.00e+0 | 0.00494 |
| GOTERM_BP_DIRECT | cell-cell junction maintenance                                             | 0% | 3  | 720 | 10   | 19512 | 0.0501 | 1.00e+0 | 8.13  | 1.00e+0 | 1.00e+0 | 0.00494 |
| GOTERM_BP_DIRECT | salivary gland morphogenesis                                               | 0% | 3  | 720 | 10   | 19512 | 0.0501 | 1.00e+0 | 8.13  | 1.00e+0 | 1.00e+0 | 0.00494 |
| GOTERM_BP_DIRECT | post-translational protein modification                                    | 1% | 5  | 720 | 38   | 19512 | 0.0502 | 1.00e+0 | 3.57  | 1.00e+0 | 1.00e+0 | 0.0124  |
| GOTERM_BP_DIRECT | carbohydrate derivative metabolic process                                  | 0% | 4  | 720 | 23   | 19512 | 0.051  | 1.00e+0 | 4.71  | 1.00e+0 | 1.00e+0 | 0.00931 |
| GOTERM_BP_DIRECT | defense response to virus                                                  | 2% | 16 | 720 | 256  | 19512 | 0.0535 | 1.00e+0 | 1.69  | 1.00e+0 | 1.00e+0 | 0.0285  |
| GOTERM_BP_DIRECT | positive regulation of epithelial cell migration                           | 1% | 5  | 720 | 39   | 19512 | 0.0544 | 1.00e+0 | 3.47  | 1.00e+0 | 1.00e+0 | 0.0138  |
| GOTERM_BP_DIRECT | cell adhesion mediated by integrin                                         | 1% | 5  | 720 | 39   | 19512 | 0.0544 | 1.00e+0 | 3.47  | 1.00e+0 | 1.00e+0 | 0.0138  |
| GOTERM_BP_DIRECT | intracellular receptor signaling pathway                                   | 1% | 5  | 720 | 39   | 19512 | 0.0544 | 1.00e+0 | 3.47  | 1.00e+0 | 1.00e+0 | 0.0138  |
| GOTERM_BP_DIRECT | glycolytic process                                                         | 1% | 6  | 720 | 56   | 19512 | 0.0548 | 1.00e+0 | 2.90  | 1.00e+0 | 1.00e+0 | 0.0168  |
| GOTERM_BP_DIRECT | heart development                                                          | 2% | 17 | 720 | 280  | 19512 | 0.0556 | 1.00e+0 | 1.65  | 1.00e+0 | 1.00e+0 | 0.031   |
| GOTERM_BP_DIRECT | positive regulation of peptidyl-tyrosine phosphorylation                   | 0% | 4  | 720 | 24   | 19512 | 0.0568 | 1.00e+0 | 4.52  | 1.00e+0 | 1.00e+0 | 0.0108  |
| GOTERM_BP_DIRECT | positive regulation of megakaryocyte differentiation                       | 0% | 3  | 720 | 11   | 19512 | 0.0598 | 1.00e+0 | 7.39  | 1.00e+0 | 1.00e+0 | 0.00661 |
| GOTERM_BP_DIRECT | regulation of cell cycle phase transition                                  | 0% | 3  | 720 | 11   | 19512 | 0.0598 | 1.00e+0 | 7.39  | 1.00e+0 | 1.00e+0 | 0.00661 |
| GOTERM_BP_DIRECT | establishment of blood-brain barrier                                       | 0% | 3  | 720 | 11   | 19512 | 0.0598 | 1.00e+0 | 7.39  | 1.00e+0 | 1.00e+0 | 0.00661 |
| GOTERM_BP_DIRECT | ganglioside biosynthetic process                                           | 0% | 3  | 720 | 11   | 19512 | 0.0598 | 1.00e+0 | 7.39  | 1.00e+0 | 1.00e+0 | 0.00661 |
| GOTERM_BP_DIRECT | transferrin transport                                                      | 0% | 3  | 720 | 11   | 19512 | 0.0598 | 1.00e+0 | 7.39  | 1.00e+0 | 1.00e+0 | 0.00661 |
| GOTERM_BP_DIRECT | neuroendocrine cell differentiation                                        | 0% | 3  | 720 | 11   | 19512 | 0.0598 | 1.00e+0 | 7.39  | 1.00e+0 | 1.00e+0 | 0.00661 |
| GOTERM_BP_DIRECT | dendritic spine maintenance                                                | 0% | 3  | 720 | 11   | 19512 | 0.0598 | 1.00e+0 | 7.39  | 1.00e+0 | 1.00e+0 | 0.00661 |
| GOTERM_BP_DIRECT | neutrophil mediated immunity                                               | 0% | 3  | 720 | 11   | 19512 | 0.0598 | 1.00e+0 | 7.39  | 1.00e+0 | 1.00e+0 | 0.00661 |
| GOTERM_BP_DIRECT | regulation of blood coagulation                                            | 0% | 3  | 720 | 11   | 19512 | 0.0598 | 1.00e+0 | 7.39  | 1.00e+0 | 1.00e+0 | 0.00661 |
| GOTERM_BP_DIRECT | regulation of gene expression                                              | 3% | 23 | 720 | 419  | 19512 | 0.0616 | 1.00e+0 | 1.49  | 1.00e+0 | 1.00e+0 | 0.0384  |
| GOTERM_BP_DIRECT | sodium ion transmembrane transport                                         | 1% | 10 | 720 | 135  | 19512 | 0.0621 | 1.00e+0 | 2.01  | 1.00e+0 | 1.00e+0 | 0.028   |
| GOTERM_BP_DIRECT | positive regulation of tumor necrosis factor production                    | 1% | 9  | 720 | 115  | 19512 | 0.0624 | 1.00e+0 | 2.12  | 1.00e+0 | 1.00e+0 | 0.0265  |
| GOTERM_BP_DIRECT | integrated stress response signaling                                       | 0% | 4  | 720 | 25   | 19512 | 0.0628 | 1.00e+0 | 4.34  | 1.00e+0 | 1.00e+0 | 0.0125  |
| GOTERM_BP_DIRECT | positive regulation of gluconeogenesis                                     | 0% | 4  | 720 | 25   | 19512 | 0.0628 | 1.00e+0 | 4.34  | 1.00e+0 | 1.00e+0 | 0.0125  |
| GOTERM_BP_DIRECT | regulation of epithelial cell proliferation                                | 0% | 4  | 720 | 25   | 19512 | 0.0628 | 1.00e+0 | 4.34  | 1.00e+0 | 1.00e+0 | 0.0125  |
| GOTERM_BP_DIRECT | negative chemotaxis                                                        | 1% | 5  | 720 | 41   | 19512 | 0.0632 | 1.00e+0 | 3.30  | 1.00e+0 | 1.00e+0 | 0.0169  |
| GOTERM_BP_DIRECT | phospholipid biosynthetic process                                          | 1% | 6  | 720 | 59   | 19512 | 0.0658 | 1.00e+0 | 2.76  | 1.00e+0 | 1.00e+0 | 0.0212  |
| GOTERM_BP_DIRECT | synaptic vesicle endocytosis                                               | 1% | 5  | 720 | 42   | 19512 | 0.0679 | 1.00e+0 | 3.23  | 1.00e+0 | 1.00e+0 | 0.0186  |
| GOTERM_BP_DIRECT | positive regulation of collagen biosynthetic process                       | 0% | 4  | 720 | 26   | 19512 | 0.0691 | 1.00e+0 | 4.17  | 1.00e+0 | 1.00e+0 | 0.0144  |
| GOTERM_BP_DIRECT | cell-substrate adhesion                                                    | 0% | 4  | 720 | 26   | 19512 | 0.0691 | 1.00e+0 | 4.17  | 1.00e+0 | 1.00e+0 | 0.0144  |
| GOTERM_BP_DIRECT | microtubule nucleation                                                     | 0% | 4  | 720 | 26   | 19512 | 0.0691 | 1.00e+0 | 4.17  | 1.00e+0 | 1.00e+0 | 0.0144  |
| GOTERM_BP_DIRECT | regulation of toll-like receptor signaling pathway                         | 0% | 3  | 720 | 12   | 19512 | 0.0701 | 1.00e+0 | 6.77  | 1.00e+0 | 1.00e+0 | 0.00858 |
| GOTERM_BP_DIRECT | collagen-activated tyrosine kinase receptor signaling pathway              | 0% | 3  | 720 | 12   | 19512 | 0.0701 | 1.00e+0 | 6.77  | 1.00e+0 | 1.00e+0 | 0.00858 |
| GOTERM_BP_DIRECT | positive regulation of cytokine-mediated signaling pathway                 | 0% | 3  | 720 | 12   | 19512 | 0.0701 | 1.00e+0 | 6.77  | 1.00e+0 | 1.00e+0 | 0.00858 |
| GOTERM_BP_DIRECT | positive regulation of MAPK cascade                                        | 2% | 14 | 720 | 224  | 19512 | 0.0717 | 1.00e+0 | 1.69  | 1.00e+0 | 1.00e+0 | 0.0387  |
| GOTERM_BP_DIRECT | negative regulation of Kit signaling pathway                               | 0% | 2  | 720 | 2    | 19512 | 0.0723 | 1.00e+0 | 27.10 | 1.00e+0 | 1.00e+0 | 0.00136 |
| GOTERM_BP_DIRECT | positive regulation of long-chain fatty acid import across plasma membrane | 0% | 2  | 720 | 2    | 19512 | 0.0723 | 1.00e+0 | 27.10 | 1.00e+0 | 1.00e+0 | 0.00136 |
| GOTERM_BP_DIRECT | respiratory basal cell differentiation                                     | 0% | 2  | 720 | 2    | 19512 | 0.0723 | 1.00e+0 | 27.10 | 1.00e+0 | 1.00e+0 | 0.00136 |
| GOTERM_BP_DIRECT | regulation of glucocorticoid metabolic process                             | 0% | 2  | 720 | 2    | 19512 | 0.0723 | 1.00e+0 | 27.10 | 1.00e+0 | 1.00e+0 | 0.00136 |
| GOTERM_BP_DIRECT | olfactory learning                                                         | 0% | 2  | 720 | 2    | 19512 | 0.0723 | 1.00e+0 | 27.10 | 1.00e+0 | 1.00e+0 | 0.00136 |
| GOTERM_BP_DIRECT | protein deamination                                                        | 0% | 2  | 720 | 2    | 19512 | 0.0723 | 1.00e+0 | 27.10 | 1.00e+0 | 1.00e+0 | 0.00136 |
| GOTERM_BP_DIRECT | protein autophosphorylation                                                | 1% | 9  | 720 | 119  | 19512 | 0.073  | 1.00e+0 | 2.05  | 1.00e+0 | 1.00e+0 | 0.0321  |
| GOTERM_BP_DIRECT | cell-cell adhesion                                                         | 2% | 14 | 720 | 225  | 19512 | 0.074  | 1.00e+0 | 1.69  | 1.00e+0 | 1.00e+0 | 0.0398  |
| GOTERM_BP_DIRECT | cellular response to hypoxia                                               | 1% | 10 | 720 | 140  | 19512 | 0.0744 | 1.00e+0 | 1.94  | 1.00e+0 | 1.00e+0 | 0.0348  |
| GOTERM_BP_DIRECT | positive regulation of interleukin-17 production                           | 0% | 4  | 720 | 27   | 19512 | 0.0757 | 1.00e+0 | 4.01  | 1.00e+0 | 1.00e+0 | 0.0164  |
| GOTERM_BP_DIRECT | ATP biosynthetic process                                                   | 0% | 4  | 720 | 27   | 19512 | 0.0757 | 1.00e+0 | 4.01  | 1.00e+0 | 1.00e+0 | 0.0164  |
| GOTERM_BP_DIRECT | protein polyubiquitination                                                 | 1% | 11 | 720 | 162  | 19512 | 0.0771 | 1.00e+0 | 1.84  | 1.00e+0 | 1.00e+0 | 0.038   |
| GOTERM_BP_DIRECT | regulation of glycolytic process                                           | 0% | 3  | 720 | 13   | 19512 | 0.0809 | 1.00e+0 | 6.25  | 1.00e+0 | 1.00e+0 | 0.0108  |
| GOTERM_BP_DIRECT | regulation of resting membrane potential                                   | 0% | 3  | 720 | 13   | 19512 | 0.0809 | 1.00e+0 | 6.25  | 1.00e+0 | 1.00e+0 | 0.0108  |
| GOTERM_BP_DIRECT | phosphate ion transmembrane transport                                      | 0% | 3  | 720 | 13   | 19512 | 0.0809 | 1.00e+0 | 6.25  | 1.00e+0 | 1.00e+0 | 0.0108  |
| GOTERM_BP_DIRECT | protein acetylation                                                        | 0% | 3  | 720 | 13   | 19512 | 0.0809 | 1.00e+0 | 6.25  | 1.00e+0 | 1.00e+0 | 0.0108  |
| GOTERM_BP_DIRECT | negative regulation of neural precursor cell proliferation                 | 0% | 3  | 720 | 13   | 19512 | 0.0809 | 1.00e+0 | 6.25  | 1.00e+0 | 1.00e+0 | 0.0108  |
| GOTERM_BP_DIRECT | response to muramyl dipeptide                                              | 0% | 3  | 720 | 13   | 19512 | 0.0809 | 1.00e+0 | 6.25  | 1.00e+0 | 1.00e+0 | 0.0108  |
| GOTERM_BP_DIRECT | response to lipopolysaccharide                                             | 1% | 11 | 720 | 164  | 19512 | 0.0822 | 1.00e+0 | 1.82  | 1.00e+0 | 1.00e+0 | 0.041   |
| GOTERM_BP_DIRECT | negative regulation of ossification                                        | 0% | 4  | 720 | 28   | 19512 | 0.0826 | 1.00e+0 | 3.87  | 1.00e+0 | 1.00e+0 | 0.0186  |
| GOTERM_BP_DIRECT | regulation of intracellular signal transduction                            | 1% | 5  | 720 | 45   | 19512 | 0.0831 | 1.00e+0 | 3.01  | 1.00e+0 | 1.00e+0 | 0.0244  |
| GOTERM_BP_DIRECT | monatomic ion transmembrane transport                                      | 3% | 22 | 720 | 413  | 19512 | 0.0865 | 1.00e+0 | 1.44  | 1.00e+0 | 1.00e+0 | 0.0553  |
| GOTERM_BP_DIRECT | negative regulation of viral genome replication                            | 1% | 5  | 720 | 46   | 19512 | 0.0885 | 1.00e+0 | 2.95  | 1.00e+0 | 1.00e+0 | 0.0266  |
| GOTERM_BP_DIRECT | positive regulation of JNK cascade                                         | 1% | 8  | 720 | 104  | 19512 | 0.0895 | 1.00e+0 | 2.08  | 1.00e+0 | 1.00e+0 | 0.0385  |
| GOTERM_BP_DIRECT | negative regulation of miRNA transcription                                 | 0% | 4  | 720 | 29   | 19512 | 0.0897 | 1.00e+0 | 3.74  | 1.00e+0 | 1.00e+0 | 0.021   |
| GOTERM_BP_DIRECT | positive regulation of mitotic nuclear division                            | 0% | 4  | 720 | 29   | 19512 | 0.0897 | 1.00e+0 | 3.74  | 1.00e+0 | 1.00e+0 | 0.021   |
| GOTERM_BP_DIRECT | cell differentiation                                                       | 6% | 50 | 720 | 1094 | 19512 | 0.0913 | 1.00e+0 | 1.24  | 1.00e+0 | 1.00e+0 | 0.0693  |
| GOTERM_BP_DIRECT | receptor recycling                                                         | 0% | 3  | 720 | 14   | 19512 | 0.0921 | 1.00e+0 | 5.81  | 1.00e+0 | 1.00e+0 | 0.0134  |
| GOTERM_BP_DIRECT | positive regulation of triglyceride biosynthetic process                   | 0% | 3  | 720 | 14   | 19512 | 0.0921 | 1.00e+0 | 5.81  | 1.00e+0 | 1.00e+0 | 0.0134  |
| GOTERM_BP_DIRECT | mesodermal cell differentiation                                            | 0% | 3  | 720 | 14   | 19512 | 0.0921 | 1.00e+0 | 5.81  | 1.00e+0 | 1.00e+0 | 0.0134  |
| GOTERM_BP_DIRECT | transport across blood-brain barrier                                       | 1% | 7  | 720 | 85   | 19512 | 0.0935 | 1.00e+0 | 2.23  | 1.00e+0 | 1.00e+0 | 0.0375  |
| GOTERM_BP_DIRECT | cytoplasmic microtubule organization                                       | 1% | 5  | 720 | 47   | 19512 | 0.0941 | 1.00e+0 | 2.88  | 1.00e+0 | 1.00e+0 | 0.0289  |
| GOTERM_BP_DIRECT | cell-cell junction organization                                            | 0% | 4  | 720 | 30   | 19512 | 0.0971 | 1.00e+0 | 3.61  | 1.00e+0 | 1.00e+0 | 0.0235  |
| GOTERM_BP_DIRECT | establishment or maintenance of epithelial cell apical/basal polarity      | 0% | 4  | 720 | 30   | 19512 | 0.0971 | 1.00e+0 | 3.61  | 1.00e+0 | 1.00e+0 | 0.0235  |
| GOTERM_BP_DIRECT | positive regulation of Rho protein signal transduction                     | 0% | 4  | 720 | 30   | 19512 | 0.0971 | 1.00e+0 | 3.61  | 1.00e+0 | 1.00e+0 | 0.0235  |
| GOTERM_BP_DIRECT | peptidyl-serine phosphorylation                                            | 1% | 5  | 720 | 48   | 19512 | 0.0998 | 1.00e+0 | 2.82  | 1.00e+0 | 1.00e+0 | 0.0313  |
