# Supplementary material
Source: Research Square preprint supplement (doi:10.21203/rs.3.rs-9214080/v1)
Supplement: Supplementary file 6 [file d380d01d41b2f270b21a7310.docx]

**Supplementary materials and methods**

Genomic DNA was extracted from both control and NPM1 KD HeLa cells. DNA fragments containing the guide RNA sequence were amplified by PCR using oligonucleotides 5’-TCTGCTTTGCCCTCTGGTAG-3’ and 5’-AAGGCAAGTTGAACAGTGTGA-3’. The PCR reactions were performed using Phusion High-Fidelity DNA polymerase (New England Biolabs, MA, USA) according to the manufacturer’s instructions. The DNA fragments (440 bp for the control *NPM1* gene) were purified and used as templates for sequencing reactions with the primer 5’-TCTGCTTTGCCCTCTGGTAG-3’. The DNA sequences obtained from control and NPM1 KD cells are shown in Supplementary Figure 1. Based on the overlapped signals starting from the position indicated by the arrow, a 14-nucleotide deletion was identified in a single allele of the *NPM1* gene in NPM1 KD cells. The missing nucleotides in NPM1 KD cells span the junction between Exon 2 and Intron 2, suggesting that the *NPM1* gene transcript from this allele is not properly spliced.
